# Supplementary material for: A scoping review of malaria forecasting: past work and future directions
Source: PubMed Central journal article supplement — BMJ Open. 2012 Nov 24;2(6):e001992. doi: 10.1136/bmjopen-2012-001992 (PMC3533056; doi:10.1136/bmjopen-2012-001992), 2012-11-24
Supplement: bmjopen-2012-001992.draft_revisions.pdf [file bmjopen-2012-001992.draft_revisions.pdf]

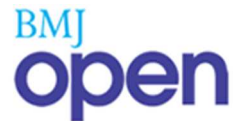

## A scoping review of malaria forecasting: Past work and future directions

|                                 |                                                                                                                                                                                                                                                                                                                                                                                                                                                                                                                                                                                                                                                                                                                                                                                                                                                                                                                            |
|---------------------------------|----------------------------------------------------------------------------------------------------------------------------------------------------------------------------------------------------------------------------------------------------------------------------------------------------------------------------------------------------------------------------------------------------------------------------------------------------------------------------------------------------------------------------------------------------------------------------------------------------------------------------------------------------------------------------------------------------------------------------------------------------------------------------------------------------------------------------------------------------------------------------------------------------------------------------|
| Journal:                        | <i>BMJ Open</i>                                                                                                                                                                                                                                                                                                                                                                                                                                                                                                                                                                                                                                                                                                                                                                                                                                                                                                            |
| Manuscript ID:                  | bmjopen-2012-001992                                                                                                                                                                                                                                                                                                                                                                                                                                                                                                                                                                                                                                                                                                                                                                                                                                                                                                        |
| Article Type:                   | Research                                                                                                                                                                                                                                                                                                                                                                                                                                                                                                                                                                                                                                                                                                                                                                                                                                                                                                                   |
| Date Submitted by the Author:   | 22-Aug-2012                                                                                                                                                                                                                                                                                                                                                                                                                                                                                                                                                                                                                                                                                                                                                                                                                                                                                                                |
| Complete List of Authors:       | Zinszer, Kate; McGill University, Epidemiology, Biostatistics, and Occupational Health<br>Verman, Aman; McGill University, Epidemiology, Biostatistics, and Occupational Health<br>Charland, Katia; McGill University, Epidemiology, Biostatistics, and Occupational Health; Harvard University, Harvard-MIT Division of Health Sciences and Technology<br>Brewer, Timothy; McGill University, Epidemiology, Biostatistics, and Occupational Health; McGill University, Faculty of Medicine<br>Brownstein, John; Harvard University, Harvard-MIT Division of Health Sciences and Technology; Harvard University, Division of Emergency Medicine<br>Sun, Zhuoyu; McGill University, Epidemiology, Biostatistics, and Occupational Health<br>Buckeridge, David; McGill University, Epidemiology, Biostatistics, and Occupational Health; Agence de la Santé et des services Sociaux de Montréal, Direction de santé publique |
| <b>Primary Subject Heading</b>: | Epidemiology                                                                                                                                                                                                                                                                                                                                                                                                                                                                                                                                                                                                                                                                                                                                                                                                                                                                                                               |
| Secondary Subject Heading:      | Infectious diseases, Public health, Global health                                                                                                                                                                                                                                                                                                                                                                                                                                                                                                                                                                                                                                                                                                                                                                                                                                                                          |
| Keywords:                       | Epidemiology < INFECTIOUS DISEASES, INFECTIOUS DISEASES, Public health < INFECTIOUS DISEASES, Epidemiology < TROPICAL MEDICINE                                                                                                                                                                                                                                                                                                                                                                                                                                                                                                                                                                                                                                                                                                                                                                                             |
|                                 |                                                                                                                                                                                                                                                                                                                                                                                                                                                                                                                                                                                                                                                                                                                                                                                                                                                                                                                            |

SCHOLARONE™  
Manuscripts

**Title:** A scoping review of malaria forecasting: Past work and future directions

**Authors:** Kate Zinszer<sup>1,2</sup>, Aman D. Verma<sup>1,2</sup>, Katia Charland<sup>1,2,3,4</sup>, Timothy F. Brewer<sup>1,5</sup>, John S. Brownstein<sup>1,3,4,5</sup>, Zhuoyu Sun<sup>1</sup>, David L. Buckeridge<sup>1,2,6</sup>

**Addresses & Affiliations:**

<sup>1</sup>Department of Epidemiology, Biostatistics & Occupational Health, McGill University, Montreal, Canada

<sup>2</sup>Surveillance Lab, Clinical and Health Informatics Research Group, McGill University, Montreal, Canada

<sup>3</sup>Children's Hospital Informatics Program at the Harvard-MIT Division of Health Sciences and Technology, Harvard University, Boston, USA

<sup>4</sup>Division of Emergency Medicine, Children's Hospital Boston, Boston, USA

<sup>5</sup>Faculty of Medicine, McGill University, Montreal, Canada

<sup>6</sup>Agence de la Santé et des services Sociaux de Montréal, Direction de santé publique, 3725 Saint-Denis Street, Montréal, Québec, Canada H2L 1M3

**Corresponding author:** Kate Zinszer; Surveillance Lab, Clinical and Health Informatics Research Group, McGill University, 1040 Pine Avenue West, Montreal, Quebec, Canada H3A 1A3 kate.zinszer@mail.mcgill.ca, phone: 514-934-1934 x 32983, fax: 514-843-1551

**Key words:** malaria, epidemiology, forecasting, methods, review

**Word count:** 3,685

## ABSTRACT

**Objectives:** The diversity of malaria forecasting methods has created difficulties in identifying the optimal predictors and methods that would provide the most accurate malaria forecasts. The objective of our review is to identify and assess methods, including predictors, used to forecast malaria.

**Design:** Scoping review. Two independent reviewers searched information sources, assessed studies for inclusion and extracted data from each study.

**Information sources:** Search strategies were developed and the following databases were searched: CAB Abstracts, EMBASE, Global Health, MEDLINE, ProQuest Dissertations & Theses, and Web of Science. Key journals and websites were also manually searched.

**Eligibility criteria for included studies:** We included studies that forecasted incidence, prevalence, or epidemics of malaria over time. A description of the forecasting model and an assessment of the forecast accuracy of the model were requirements for inclusion.

Studies were restricted to human populations and to autochthonous transmission settings.

**Results:** We identified 29 different studies that met our inclusion criteria for this review. The forecasting approaches included statistical modelling, mathematical modelling, and machine learning methods. Climate-related predictors were used consistently in forecasting models, with the most common predictors being rainfall, relative humidity, temperature, and the normalized difference vegetation index. Model evaluation was typically based upon a reserved portion of data and accuracy was measured in a variety of ways including mean squared error and correlation coefficients. We could not compare the forecast accuracy of models from the different studies as the evaluation measures were not scale independent.

1  
2  
3 **Conclusions:** Applying different forecasting methods to the same data, exploring the  
4 predictive ability of non-environmental variables, and using common forecast accuracy  
5 metrics will allow malaria researchers to compare and improve models and methods,  
6 which should improve the quality and public health impact of malaria forecasting.  
7  
8  
9

## 10 11 12 **ARTICLE SUMMARY**

### 13 14 **Article focus**

- 15  
16 • Accurate predictions of malaria can provide public health and clinical health services  
17 with the information needed to strategically implement prevention and control  
18 measures.  
19
- 20 • The diversity in forecasting methods has prevented comparisons of forecasting results,  
21 making it difficult to identify the optimal predictors and methods for malaria  
22 forecasting.  
23
- 24 • The objective was to identify and assess methods, including predictors, used to  
25 forecast malaria.  
26  
27  
28  
29  
30  
31  
32  
33  
34  
35

### 36 37 **Key messages**

- 38  
39 • When performing forecasting, it is important to understand the assumptions of  
40 each method as well as the associated advantages and disadvantages.  
41
- 42 • Common accuracy metrics are essential as they will allow the comparison of  
43 findings between studies and methods.  
44
- 45 • Applying different forecasting methods to the same data and exploring the  
46 predictive ability of non-environmental variables are necessary next steps as they  
47 will help determine the optimal approach and predictors for malaria forecasting.  
48  
49  
50  
51  
52  
53  
54  
55  
56  
57  
58  
59  
60

### Strengths and limitations of this study

- The strength of this review is that it is the first review to systematically assess malaria forecasting methods and predictors, and the recommendations in the review, if followed, will lead to improvement in the quality and public health impact of malaria forecasting.
- The key limitation of this review is that potential details regarding methodological approaches in the studies may have been missed due to these details being excluded from the published manuscript.

## INTRODUCTION

In 1911, Christophers<sup>1</sup> developed an early warning system for malaria epidemics in Punjab based upon rainfall, fever-related deaths, and wheat prices. Since that initial system, researchers and practitioners have continued to search for determinants of spatial and temporal variability of malaria to improve systems for forecasting disease burden. Malaria forecasting is now conducted in many countries and typically uses data on environmental risk factors, such as climatic conditions, to forecast incidence for a specific geographic area over a certain period of time.

Malaria is forecasted using different methods, which result in forecasts of varying accuracy. Although significant malaria predictors have been identified in different settings, the diversity in forecasting methods has hampered comparisons of results, making it difficult to identify the optimal predictors and methods for malaria forecasting. Our objective was to identify and assess methods, including predictors, used to forecast malaria. This review is intended to serve as a resource for malaria researchers and practitioners to inform future forecasting studies.

## METHODS

We included in our scoping review studies that forecasted incidence, prevalence, or epidemics of malaria over time. Whereas a systematic review is guided by a highly focused research question, a scoping review covers a subject area comprehensively by examining the extent, range, and nature of research activity on a topic.<sup>2</sup> The studies had to use models that included prior malaria incidence, prevalence, or epidemics as a predictor. A description of the forecasting model and an assessment of the forecast accuracy of the model were requirements for inclusion. Studies were restricted to human populations and to autochthonous transmission settings. We excluded studies that

1  
2  
3 provided only spatial predictions, exploratory analysis (e.g., assessing temporal  
4 correlations), mortality predictions, and/or individual-level transmission modelling.  
5  
6 Commentaries, descriptive reports, or studies that did not include original research were  
7  
8 also excluded. Additionally, for studies that were related (e.g., same setting and same  
9  
10 methods with different time periods), the study with the most comprehensive data was  
11  
12 included in the review.  
13  
14  
15

16  
17 A review protocol was developed and electronic search strategies were guided by  
18  
19 a librarian experienced in systematic and scoping reviews. Papers were identified using  
20  
21 medical subject headings and key word combinations and truncations: [“forecast\*” or  
22  
23 “predictive model\*” or “prediction model\*” or “time serie\*” or “time-serie\*”; AND  
24  
25 “malaria\*”]. The searches were not restricted by year or language although our searches  
26  
27 were restricted by the historical time periods of the databases. The citation searches  
28  
29 began on April 18, 2011 and the final citation search was conducted on May 29, 2012.  
30  
31 We searched the following databases: CAB Abstracts (1910-2012 Week 20), EMBASE  
32  
33 (1947-2012 May 28), Global Health (1910-April 2012), MEDLINE (1948-May Week 3  
34  
35 2012), ProQuest Dissertations & Theses (1861-May 29, 2012), and Web of Science  
36  
37 (1899-May 28, 2012). We performed manual searches of the Malaria Journal (2000-May  
38  
39 29, 2012) and the American Journal of Tropical Medicine and Hygiene (1921-May  
40  
41 2012). Grey literature was also searched using Google Scholar, based upon the same key  
42  
43 words used to search the databases. Additionally, the websites of the World Health  
44  
45 Organization and the United States Agency for International Development were also  
46  
47 examined for any relevant literature. To ensure that all appropriate references were  
48  
49 identified, hand searching of reference lists of all included studies was conducted and any  
50  
51 potentially relevant references were included in the review process.  
52  
53  
54  
55  
56  
57  
58  
59  
60

1  
2  
3 The citations were imported into EndNote X5 (Thomas Reuters) for management.  
4  
5 Two main reviewers (KZ, AV) examined all citations in the study selection process with  
6  
7 the exception of articles in Chinese, which were reviewed by a third reviewer (NS). The  
8  
9 first stage of review involved each reviewer independently identifying potentially  
10  
11 relevant studies based upon information provided in the title and abstract. If it was  
12  
13 uncertain whether to include or exclude a study during the first stage of review, the  
14  
15 citation was kept and included in the full article review.  
16  
17  
18

19  
20 The second stage of review involved each reviewer independently identifying  
21  
22 potentially relevant studies based upon full article review; data abstraction occurred for  
23  
24 those articles that met the inclusion criteria. From each study, we abstracted the  
25  
26 following: setting, outcome, covariates, data source(s), time frame of observed data,  
27  
28 forecasting and model evaluation methodologies, final models and associated measures  
29  
30 of prediction accuracy. Quality of the included studies was not assessed as the objective  
31  
32 was to conduct a scoping review and not a systematic review. Any discordance among  
33  
34 the reviewers regarding inclusion or exclusion of studies or with respect to the  
35  
36 information abstracted from the included studies was resolved by consultation with  
37  
38 another author (DB).  
39  
40  
41  
42

## 43 RESULTS

44  
45 Our search identified 613 potentially relevant articles for the scoping review after  
46  
47 duplicate citations were removed (figure 1). We identified 29 different studies that met  
48  
49 our inclusion criteria for this review; they are described briefly in table 1. Malaria  
50  
51 forecasting has been conducted in 13 different countries with China as the most frequent  
52  
53 site of malaria forecasting. The size of the geographic region of study ranged from  
54  
55 municipal level to larger administrative divisions such as country and provinces or  
56  
57  
58  
59  
60



**Table 1. Characteristics of malaria forecasting studies included in review (n=29)**

| Authors<br>(reference no.)            | Population and setting                                                                        | Model specifics                                                                                               | Malaria<br>outcome            | No. of data points used<br>for training/testing                         | Evaluation measure                                                                     |
|---------------------------------------|-----------------------------------------------------------------------------------------------|---------------------------------------------------------------------------------------------------------------|-------------------------------|-------------------------------------------------------------------------|----------------------------------------------------------------------------------------|
| <i>Regression forecasting studies</i> |                                                                                               |                                                                                                               |                               |                                                                         |                                                                                        |
| Adimi et al. <sup>3</sup>             | Community health post data from 2004-7 for 23 provinces in Afghanistan; clinical confirmation | 23 linear regressions (1 for each province); included autoregressive, seasonal and trend parameters           | Monthly cases                 | 31/6 (varied between provinces but last 6 months used only for testing) | Root mean squared error & absolute difference                                          |
| Chatterjee and Sarkar <sup>4</sup>    | Municipal data for 2002-5 for Chennai city, India; microscopic confirmation                   | Logistic regression; polynominal and autoregressive parameters                                                | Monthly slide positivity rate | 36/1                                                                    | 95% CI (for predicted value and compared to observed)                                  |
| Gomez-Elipse et al. <sup>5</sup>      | Health service data from 1997-2003 for Karuzi province, Burundi; clinical confirmation        | Linear regression; adjusted for population, lagged weather covariates, autoregressive and seasonal parameters | Monthly incidence             | 60/24; 1 month ahead forecasts                                          | 95% CI, correlation, p-value trend line of difference (between predicted and observed) |

1  
2  
3  
4  
5  
6  
7  
8  
9  
10  
11  
12  
13  
14  
15  
16  
17  
18  
19  
20  
21  
22  
23  
24  
25  
26  
27  
28  
29  
30  
31  
32  
33  
34  
35  
36  
37  
38  
39  
40  
41  
42  
43  
44  
45  
46  
47  
48  
49

|                                |                                                                                                       |                                                                                                                                                            |                                                  |                                                  |                                                              |
|--------------------------------|-------------------------------------------------------------------------------------------------------|------------------------------------------------------------------------------------------------------------------------------------------------------------|--------------------------------------------------|--------------------------------------------------|--------------------------------------------------------------|
| Haghdooost et al. <sup>6</sup> | District health centre data from 1994-2001 for Kahnooj District, Iran; microscopic confirmation       | Separate Poisson regressions for <i>P. vivax</i> and <i>P. falciparum</i> ; population offset, lagged weather covariates, seasonality and trend parameters | 10-day cases                                     | 213/73                                           | Average percent error                                        |
| Rahman et al. <sup>7</sup>     | Hospital data from 1992-2001 for all divisions of Bangladesh; clinical confirmation                   | 4 linear regressions (1 for each administrative division and 1 for all of Bangladesh); environmental covariate for weeks of highest correlation            | Yearly cases                                     | 10, 1 year was removed from series at a time     | Root mean squared error & relative bias (observed-predicted) |
| Roy et al. <sup>8</sup>        | Municipal data for Chennai city (2002-4) and Mangalore city (2003-7), India; microscopic confirmation | 2 linear regressions (1 for each city); adjusted for population, lagged weather covariates, autoregressive term, interaction terms, polynomial terms       | Monthly SPR (Chennai), monthly cases (Mangalore) | 28/8 (Chennai), 48/12 (Mangalore); 1 month ahead | 95% CI                                                       |

|                                                                                                          |                                   |                                                                                                  |                                                                                                                                                        |                           |                                                                                                                                  |                                                                                                      |
|----------------------------------------------------------------------------------------------------------|-----------------------------------|--------------------------------------------------------------------------------------------------|--------------------------------------------------------------------------------------------------------------------------------------------------------|---------------------------|----------------------------------------------------------------------------------------------------------------------------------|------------------------------------------------------------------------------------------------------|
| 1<br>2<br>3<br>4<br>5<br>6<br>7<br>8<br>9<br>10<br>11<br>12<br>13<br>14<br>15<br>16<br>17<br>18<br>19    | Teklehaimanot et al. <sup>9</sup> | Health facility data from 1990-2000 for all districts in Ethiopia; microscopic confirmation      | 10 Poisson regressions (1 for each district); lagged weather covariates, autoregressive term, time trend and indicator covariates for week of the year | Weekly cases              | 572 (varied between districts, training & testing); 52 weeks (year) were removed from series at a time; 1-4 week ahead forecasts | Compared performance of alerts from predicted vs. observed cases (using potentially prevented cases) |
| 20<br>21<br>22<br>23<br>24<br>25<br>26<br>27                                                             | Xiao et al. <sup>10</sup>         | Medical and health unit data from 1995-2007 for Hainan province, China; microscopic confirmation | Poisson regression; lagged weather covariates, autoregressive term                                                                                     | Monthly incidence         | 144/12                                                                                                                           | T-test (predictive value significantly different than actual)                                        |
| 28<br>29<br>30<br>31<br>32<br>33<br>34<br>35<br>36<br>37<br>38<br>39<br>40<br>41<br>42<br>43<br>44<br>45 | Yacob and Swaroop <sup>11</sup>   | Medical data from 1944-6 for all health districts in Punjab; clinical confirmation               | 19 linear regressions (1 for each district); include coefficients of correlation between rainfall and epidemic figures from 1914 to 1943               | Seasonal epidemic figure* |                                                                                                                                  | Coefficient of correlation (between actual and predicted epidemic figure)                            |

1  
2  
3  
4  
5  
6  
7  
8  
9  
10  
11  
12  
13  
14  
15  
16  
17  
18  
19  
20  
21  
22  
23  
24  
25  
26  
27  
28  
29  
30  
31  
32  
33  
34  
35  
36  
37  
38  
39  
40  
41  
42  
43  
44  
45  
46  
47  
48  
49

|                                  |                                                                                                          |                                                                                                                                                                       |                                          |                                                                                                                    |                                                              |
|----------------------------------|----------------------------------------------------------------------------------------------------------|-----------------------------------------------------------------------------------------------------------------------------------------------------------------------|------------------------------------------|--------------------------------------------------------------------------------------------------------------------|--------------------------------------------------------------|
| Yan et al. <sup>12</sup>         | Municipal data from 1951-2001 for Chongquin city, China                                                  | Linear regression; logarithm curve                                                                                                                                    | Yearly cases                             | 50/1                                                                                                               | Visual inspection of predicted within range of actual values |
| <i>ARIMA forecasting studies</i> |                                                                                                          |                                                                                                                                                                       |                                          |                                                                                                                    |                                                              |
| Abeku et al. <sup>13</sup>       | Health clinics data from 1986-99 for 20 areas in Ethiopia; mixture of microscopic and clinical confirmed | 20 models (1 for each area) compared approaches: Overall average, seasonal average, seasonal adjustment, ARIMA                                                        | Monthly cases                            | 168/12 (varied between areas but last 12 months only used for testing); 1-12 month ahead forecasts                 | Average forecast error                                       |
| Briët et al. <sup>14</sup>       | Health facility data from 1972-2005 for all districts in Sri Lanka; microscopic confirmation             | 25 models (1 for each district) compared approaches: Holt-Winters, ARIMA (seasonality assessed with fixed effects or harmonics) and SARIMA; lagged weather covariates | Monthly cases of malaria slide positives | 180/204 (varied between districts but approximately 50% of series reserved for testing); 1-4 month ahead forecasts | Mean absolute relative error                                 |
| Liu et al. <sup>15</sup>         | Data from 2004-10 for China                                                                              | SARIMA                                                                                                                                                                | Monthly incidence                        | 72/12                                                                                                              | Visual (plot of predicted vs. observed)                      |

|                                                                                                    |                             |                                                                                                   |                                                                              |                         |                                          |                                         |
|----------------------------------------------------------------------------------------------------|-----------------------------|---------------------------------------------------------------------------------------------------|------------------------------------------------------------------------------|-------------------------|------------------------------------------|-----------------------------------------|
| 1<br>2<br>3<br>4<br>5<br>6<br>7<br>8<br>9<br>10                                                    | Wangdi et al. <sup>16</sup> | Health center data from 1994-2008 for 7 districts in Bhutan; microscopic and antigen confirmation | 7 models (1 for each district): SARIMA and ARIMAX; lagged weather covariates | Monthly cases           | 144/24                                   | Mean average percent error              |
| 11<br>12<br>13<br>14<br>15                                                                         | Wen et al. <sup>17</sup>    | Data from 1991-2002 for Wanning County, China                                                     | SARIMA                                                                       | Monthly incidence       | 252/12                                   | 95% CI                                  |
| 16<br>17<br>18<br>19<br>20<br>21                                                                   | Zhang et al. <sup>18</sup>  | CDC data from 1959-79 for Jinan city, China; clinical confirmation                                | SARIMA; lagged weather covariates                                            | Monthly cases           | 84/120 (removed 1967 & 1968 from series) | Visual (plot of predicted vs. observed) |
| 22<br>23<br>24<br>25<br>26<br>27<br>28                                                             | Zhou et al. <sup>19</sup>   | Data from 1996-2007 for Huaiyuan County, China; microscopic and clinical confirmation             | SARIMA                                                                       | Monthly incidence       | 108/12                                   | Average error                           |
| 29<br>30<br>31<br>32<br>33<br>34<br>35<br>36<br>37<br>38<br>39<br>40<br>41<br>42<br>43<br>44<br>45 | Zhu et al. <sup>20</sup>    | Data from 1998-2007 for Huaiyuan and Tongbai counties, China                                      | SARIMA                                                                       | Monthly incidence rates | 84/24; 1-12 month ahead forecasts        | 95% CI & error                          |

1  
2  
3  
4  
5  
6  
7  
8  
9  
10  
11  
12  
13  
14  
15  
16  
17  
18  
19  
20  
21  
22  
23  
24  
25  
26  
27  
28  
29  
30  
31  
32  
33  
34  
35  
36  
37  
38  
39  
40  
41  
42  
43  
44  
45  
46  
47  
48  
49

*Mathematical forecasting studies*

|                              |                                                                                                                                              |                                                                                                               |                                                                                                 |                                                                     |                                                          |
|------------------------------|----------------------------------------------------------------------------------------------------------------------------------------------|---------------------------------------------------------------------------------------------------------------|-------------------------------------------------------------------------------------------------|---------------------------------------------------------------------|----------------------------------------------------------|
| Gaudart et al. <sup>21</sup> | Data from cohort of children from 1996-2000 in Bancoumana (municipality), Mali from 1996-2006; microscopic confirmation                      | VSEIRS model                                                                                                  | Monthly incidence rate                                                                          | 60 (training & testing); 15 day, 1 month, 2 month, season forecasts | Mean absolute percentage error & root mean squared error |
| Laneri et al. <sup>22</sup>  | Health centre data (passive and active surveillance) for Kutch (1987-2007) and Balmer (1985-2005) Districts, India; microscopic confirmation | 2 models (1 for each district); compared 2 types of VSEIRS model to linear and negative binominal regressions | Monthly incidence for parameter estimation; Seasonal totals (Sept-Dec) for epidemic forecasting | 240 (training & testing); 1 to 4 month ahead forecasts              | Weighted mean square error & prediction likelihood       |

*Neural network forecast studies*

|                            |                                                                                         |                                              |                   |                                      |                                    |
|----------------------------|-----------------------------------------------------------------------------------------|----------------------------------------------|-------------------|--------------------------------------|------------------------------------|
| Cunha et al. <sup>23</sup> | Ministry of Health data from 2003-9 for Cornwall City, Brazil; microscopic confirmation | Compared neural network to linear regression | Monthly cases     | 72/12; 3, 6, and 12 months forecasts | Absolute error & mean square error |
| Gao et al. <sup>24</sup>   | Data from 1994-9 for Honghe State, China                                                | Neural network                               | Monthly incidence | 48/12                                | Percent error                      |

|    |                            |                                                                                              |                                                                                                 |                            |       |                                                                                |
|----|----------------------------|----------------------------------------------------------------------------------------------|-------------------------------------------------------------------------------------------------|----------------------------|-------|--------------------------------------------------------------------------------|
| 1  |                            |                                                                                              |                                                                                                 |                            |       |                                                                                |
| 2  |                            |                                                                                              |                                                                                                 |                            |       |                                                                                |
| 3  |                            |                                                                                              |                                                                                                 |                            |       |                                                                                |
| 4  |                            |                                                                                              |                                                                                                 |                            |       |                                                                                |
| 5  | Kiang et al. <sup>25</sup> | Hospital and clinic data from 1994-2001 for 19 provinces, Thailand; microscopic confirmation | 19 neural networks (1 for each province); various architectures used (varied by province)       | Monthly incidence          | 84/12 | Root mean square error                                                         |
| 6  |                            |                                                                                              |                                                                                                 |                            |       |                                                                                |
| 7  |                            |                                                                                              |                                                                                                 |                            |       |                                                                                |
| 8  |                            |                                                                                              |                                                                                                 |                            |       |                                                                                |
| 9  |                            |                                                                                              |                                                                                                 |                            |       |                                                                                |
| 10 |                            |                                                                                              |                                                                                                 |                            |       |                                                                                |
| 11 |                            |                                                                                              |                                                                                                 |                            |       |                                                                                |
| 12 |                            |                                                                                              |                                                                                                 |                            |       |                                                                                |
| 13 |                            |                                                                                              | <i>Other forecasting methods</i>                                                                |                            |       |                                                                                |
| 14 | Fang et al. <sup>26</sup>  | Data from 1956-88 for Xuzhou City, China                                                     | Grey and Grey Verhulst models (1,1)                                                             | Yearly incidence           | 30/2  | Percent error                                                                  |
| 15 |                            |                                                                                              |                                                                                                 |                            |       |                                                                                |
| 16 |                            |                                                                                              |                                                                                                 |                            |       |                                                                                |
| 17 |                            |                                                                                              |                                                                                                 |                            |       |                                                                                |
| 18 |                            |                                                                                              |                                                                                                 |                            |       |                                                                                |
| 19 | Gao et al. <sup>27</sup>   | Data from 1998-2005 for Longgang District, China                                             | Grey model (1,1)                                                                                | Yearly incidence           | 6/1   | Error & percent error                                                          |
| 20 |                            |                                                                                              |                                                                                                 |                            |       |                                                                                |
| 21 |                            |                                                                                              |                                                                                                 |                            |       |                                                                                |
| 22 |                            |                                                                                              |                                                                                                 |                            |       |                                                                                |
| 23 |                            |                                                                                              |                                                                                                 |                            |       |                                                                                |
| 24 | Guo et al. <sup>28</sup>   | Data from 1988-2010 China                                                                    | Grey model (1,1)                                                                                | Yearly incidence           | 21/2  | Visual (plot of predicted vs. observed)                                        |
| 25 |                            |                                                                                              |                                                                                                 |                            |       |                                                                                |
| 26 |                            |                                                                                              |                                                                                                 |                            |       |                                                                                |
| 27 | Gill <sup>29</sup>         | Medical data from 1925-6 for health districts in Punjab; clinical confirmation               | 29 forecasts consisting of visual inspection of rainfall, spleen rates, and epidemic potential† | Seasonal epidemic (yes/no) |       | Qualitative comparison of prediction (presence of epidemic) to epidemic figure |
| 28 |                            |                                                                                              |                                                                                                 |                            |       |                                                                                |
| 29 |                            |                                                                                              |                                                                                                 |                            |       |                                                                                |
| 30 |                            |                                                                                              |                                                                                                 |                            |       |                                                                                |
| 31 |                            |                                                                                              |                                                                                                 |                            |       |                                                                                |
| 32 |                            |                                                                                              |                                                                                                 |                            |       |                                                                                |
| 33 |                            |                                                                                              |                                                                                                 |                            |       |                                                                                |
| 34 |                            |                                                                                              |                                                                                                 |                            |       |                                                                                |
| 35 |                            |                                                                                              |                                                                                                 |                            |       |                                                                                |
| 36 |                            |                                                                                              |                                                                                                 |                            |       |                                                                                |
| 37 |                            |                                                                                              |                                                                                                 |                            |       |                                                                                |
| 38 |                            |                                                                                              |                                                                                                 |                            |       |                                                                                |
| 39 |                            |                                                                                              |                                                                                                 |                            |       |                                                                                |
| 40 |                            |                                                                                              |                                                                                                 |                            |       |                                                                                |
| 41 |                            |                                                                                              |                                                                                                 |                            |       |                                                                                |
| 42 |                            |                                                                                              |                                                                                                 |                            |       |                                                                                |
| 43 |                            |                                                                                              |                                                                                                 |                            |       |                                                                                |
| 44 |                            |                                                                                              |                                                                                                 |                            |       |                                                                                |
| 45 |                            |                                                                                              |                                                                                                 |                            |       |                                                                                |
| 46 |                            |                                                                                              |                                                                                                 |                            |       |                                                                                |
| 47 |                            |                                                                                              |                                                                                                 |                            |       |                                                                                |
| 48 |                            |                                                                                              |                                                                                                 |                            |       |                                                                                |
| 49 |                            |                                                                                              |                                                                                                 |                            |       |                                                                                |

1  
2  
3  
4  
5  
6  
7  
8  
9  
10  
11  
12  
13  
14  
15  
16  
17  
18  
19  
20  
21  
22  
23  
24  
25  
26  
27  
28  
29  
30  
31  
32  
33  
34  
35  
36  
37  
38  
39  
40  
41  
42  
43  
44  
45  
46  
47  
48  
49

|                             |                                                                                                          |                                                                                                              |                                    |                                                              |                                                         |
|-----------------------------|----------------------------------------------------------------------------------------------------------|--------------------------------------------------------------------------------------------------------------|------------------------------------|--------------------------------------------------------------|---------------------------------------------------------|
| Medina et al. <sup>30</sup> | Community health center data from 1996-2004 (14 centers) for Niono District, Mali; clinical confirmation | Multiplicative Holt-Winters model, age-specific rates (3 age groups); compared to seasonal adjustment method | Monthly malaria consultation rates | 36/72; 2 & 3 month ahead forecasts; one step ahead forecasts | mean absolute percentage error & 95% CI                 |
| Xu and Jin <sup>31</sup>    | Data from 2000-5 for Jiangsu Province, China                                                             | Grey model                                                                                                   | Yearly cases                       | 4/1                                                          | Visual (plot of predicted vs. observed number of cases) |

---

CI, confidence interval; ARIMA, auto-regressive integrated moving average; SARIMA, seasonal auto-regressive integrated moving average; ARIMAX, auto-regressive integrated moving average with exogenous input; VSEIRS: vector-susceptible-exposed-infected-recovered-susceptible model

\*Seasonal epidemic figure is the ratio of October incidence to mean spring incidence

†Epidemic potential is the coefficient of variability of fevers during the month of October for the periods of 1868-1921



1  
2  
3 districts. Almost all of the studies (97%) used health clinic records of malaria infections  
4  
5 from the general population as their data source for malaria infections, with one study  
6  
7 using cohort data. Eleven (38%) of the 29 studies used laboratory confirmation of malaria  
8  
9 cases (microscopy and/or rapid diagnostic tests), seven (24%) used clinical confirmation,  
10  
11 and two (7%) used a mixture of clinical and microscopic confirmation. Nine studies did  
12  
13 not state whether they used clinical or microscopic confirmation of malaria.  
14  
15

### 16 17 **Forecasting methods**

18  
19 The forecasting approaches included statistical modelling, mathematical  
20  
21 modelling, and machine learning methods. The statistical methods included generalized  
22  
23 linear models, Auto-Regressive Integrated Moving Average (ARIMA) models,<sup>32</sup> and  
24  
25 Holt-Winters models<sup>33</sup>. The mathematical models were based upon extensions of the  
26  
27 Ross-MacDonald Susceptible-Infected-Recovered malaria transmission model.<sup>34</sup> Other  
28  
29 authors predicted malaria incidence using neural networks, a machine learning  
30  
31 technique.<sup>35</sup>  
32  
33  
34  
35

36  
37 Studies using generalized linear models forecasted malaria counts, rates, or  
38  
39 proportions through linear, Poisson, or logistic regression. All but one of the regression  
40  
41 models included climate related covariates such as rainfall, temperature, vegetation,  
42  
43 and/or relative humidity.<sup>12</sup> Typically, the weather covariates were lagged, to account for  
44  
45 the delayed effects of weather on malaria infections. Two studies<sup>4, 8</sup> explored the effects  
46  
47 of including covariates as higher order polynomials. Several of the studies used a  
48  
49 generalized linear model approach to time series analysis by including previous (lagged)  
50  
51 malaria incidence as an autoregressive covariate in the model. Some models included  
52  
53 terms for season or year to account for seasonal and annual variations.  
54  
55  
56  
57  
58  
59  
60

1  
2  
3 ARIMA models regress current malaria incidence on past incidence and past  
4 random shocks. The forecasting approaches based on ARIMA modelling varied, with  
5 some including a seasonal component (SARIMA). While not explicitly stated, many  
6 studies used a transfer function model, also known as ARIMAX. ARIMAX extends  
7 ARIMA by also including as predictors current and/or past values of an independent  
8 variable. Typically, these ARIMA based models incorporated various meteorological  
9 series as covariates although one study also included data on the malaria burden in  
10 neighboring districts.<sup>14</sup>

11  
12  
13 Four studies from China used the Grey method for malaria forecasting.<sup>26-28, 31</sup>  
14 This forecasting method is essentially a curve fitting technique based on a smoothed  
15 version of the observed data.<sup>36, 37</sup> The models included in the review were of the basic  
16 form, GM(1,1), which implies that this is a univariate model (malaria counts only) and  
17 the solution is the result of solving a single differential equation.

18  
19  
20 There were two studies in the review that used extensions of the Ross-Macdonald  
21 susceptible-infected-recovered model.<sup>21, 22</sup> This approach divides the population under  
22 study into different compartments such as susceptible, infected, and recovered, and uses  
23 differential equations to model the transition over time of individuals from one group to  
24 another. By using differential equations, mathematical models can represent explicitly the  
25 dynamics of malaria infection, mosquito populations and human susceptibility. Gaudart  
26 et al.<sup>21</sup> included a vector component in a susceptible-infected-recovered type model and  
27 used data from a cohort of children, remote sensing data, literature, and expert opinions  
28 of entomologists and parasitologists. The study by Laneri et al.<sup>22</sup> used a vector-  
29 susceptible-exposed-infected-recovered-susceptible (VSEIRS) model although they  
30 incorporated two different pathways from recovery to susceptibility that were based upon

1  
2  
3 different time scales (seasonal and inter-annual), mimicking different transmission  
4  
5 intensities. They found that rainfall had a significant effect on the inter-annual variability  
6  
7 of epidemic malaria and including rainfall as a predictor improved forecast accuracy. The  
8  
9 parameters in their models were selected based upon the literature as well as laboratory  
10  
11 findings.  
12  
13

14  
15 A neural network is a machine learning method that connects a set of inputs (e.g.  
16  
17 weather covariates) to outputs (e.g. malaria counts).<sup>38</sup> The connection between inputs and  
18  
19 outputs are made via ‘neurons’ and the number of links and corresponding weights are  
20  
21 chosen to give the best possible fit to the training data. We identified three studies that  
22  
23 used neural networks in their analyses, and each study used different input data and a  
24  
25 unique network structure.<sup>23-25</sup> Two of the studies used weather variables to predict  
26  
27 malaria incidence.<sup>24, 25</sup> Gao et al.<sup>24</sup> also included evaporation and sunshine hours to  
28  
29 predict malaria incidence, two variables that were not included in any other study.  
30  
31  
32  
33

34 As shown in table 2, climate-related predictors were used consistently in  
35  
36 forecasting models, with the most common predictors being rainfall, relative humidity,  
37  
38 temperature, and normalized difference vegetation index. One study accounted for the  
39  
40 effect of malaria incidence in neighboring districts, but it was not a significant predictor  
41  
42 and was excluded from the final model.<sup>14</sup> The mathematical models included non-time  
43  
44 varying parameters such as the reporting fraction of cases (proportion of malaria cases in  
45  
46 a population that is reported to public health), average life expectancy, and several vector  
47  
48 characteristics, which are listed in table 3.  
49  
50  
51  
52  
53  
54  
55  
56  
57  
58  
59  
60

**Table 2. Time varying predictors considered in malaria forecasting models**

| Predictor                             | No. of studies (ref. no.)                    |
|---------------------------------------|----------------------------------------------|
| <b>Rainfall</b>                       |                                              |
| Total rainfall                        | 11 <sup>3-6, 9, 10, 14, 16, 18, 22, 25</sup> |
| Average rainfall                      | 2 <sup>8, 24</sup>                           |
| Rainy day index*                      | 1 <sup>14</sup>                              |
| Number of rainy days/month            | 1 <sup>24</sup>                              |
| <b>Humidity</b>                       |                                              |
| Average relative humidity             | 7 <sup>6, 8, 10, 16, 18, 24, 25</sup>        |
| Minimum humidity                      | 1 <sup>4</sup>                               |
| Maximum humidity                      | 1 <sup>4</sup>                               |
| <b>Temperature</b>                    |                                              |
| Maximum air temperature               | 8 <sup>4-6, 9, 10, 16, 18, 24</sup>          |
| Minimum air temperature               | 7 <sup>4, 5, 9, 10, 16, 18, 24</sup>         |
| Average air temperature               | 4 <sup>8, 10, 24, 25</sup>                   |
| Average LST                           | 2 <sup>3, 25</sup>                           |
| Temperature condition index           | 1 <sup>7</sup>                               |
| <b>Vegetation</b>                     |                                              |
| Average NDVI                          | 2 <sup>3, 5</sup>                            |
| Maximum NDVI                          | 2 <sup>21, 25</sup>                          |
| Vegetation condition index            | 1 <sup>7</sup>                               |
| <b>Other environmental predictors</b> |                                              |
| Average air pressure                  | 2 <sup>18, 24</sup>                          |
| Average air evaporation               | 1 <sup>24</sup>                              |
| Sunshine hours                        | 1 <sup>24</sup>                              |
| <b>Other</b>                          |                                              |
| Malaria in neighboring districts      | 1 <sup>14</sup>                              |
| Population                            | 1 <sup>4</sup>                               |

LST, land surface temperature; NDVI, normalized difference vegetation index

\*Rainy day index: dividing the number of days per month when rainfall was larger than zero by the number of days that a reading for rainfall was available

**Table 3. Parameters included in the mathematical forecasting models**

| Predictor                                                                                    | Reference no. |
|----------------------------------------------------------------------------------------------|---------------|
| Vector                                                                                       |               |
| Mean developmental delay                                                                     | 22            |
| Number of bites per night                                                                    | 21            |
| Probability of a susceptible becoming infected after one single bite from a contagious human | 21            |
| Mortality per day                                                                            | 21            |
| Density                                                                                      | 21            |
| Length of gonotrophic cycle                                                                  | 21            |
| Time lag of NDVI influence                                                                   | 21            |
| Lowest NDVI value to influence behaviour                                                     |               |
| Humans                                                                                       |               |
| Probability of a susceptible human becoming infected after one single infected bite          | 21            |
| Probability of becoming susceptible after being resistant                                    | 21, 22        |
| Probability of acquiring contagiousness                                                      | 21, 22        |
| Probability of losing contagiousness                                                         | 21, 22        |
| Average human life expectancy                                                                | 22            |
| Infectivity of quiescent cases relative to full-blown infections                             | 22            |
| Other                                                                                        |               |
| Reporting fraction*                                                                          | 22            |

NDVI, normalized difference vegetation index

\*Reporting fraction is the fraction of malaria cases in the population that are reported to public health

## Evaluation methods

Authors used different approaches to evaluate the accuracy of forecasting models. A typical approach was to segment the data into a model building or training portion with the other portion (the 'holdout' sample) used for model validation or assessing forecast accuracy. The cross-validation approach used by Rahman et al.<sup>7</sup> and Teklehaimanot et al.<sup>9</sup> excluded one year of data at a time, fit the model to the remaining data, computed forecast error (prediction residual) using data from the missing year, and then repeated the process for the subsequent years. The accuracy of the predictions was then estimated from the prediction residuals. Some of the studies used all the available data to fit a model and did not reserve data for assessing forecast accuracy.<sup>21, 22</sup>

Studies compared the forecasts to observed values using various measures: mean squared error, mean relative error, mean percentage error, correlation coefficients, paired t-tests (between predicted and observed values), 95% confidence intervals (of predicted values and determined if observed values fell within the interval), and visualizations (e.g. graphical representations of observed and predicted values).

## Comparison of forecasting methods

We could not compare the forecast accuracy of models from different studies as the evaluation measures used in different studies were not scale independent. However, we were able to synthesize the findings from studies that compared different methods within a single study.

Abeku et al.<sup>13</sup> found that their ARIMA models provided the least accurate forecasts when compared with variations of seasonal averages, and the most accurate forecasts were produced by the seasonal average that incorporated deviations from the last three observations (SA<sub>3</sub>). In contrast, Briet et al.<sup>14</sup> found that the most accurate model

1  
2  
3 varied by district and forecasting horizon, but the SARIMA approach tended to provide  
4 the most accurate forecasts, followed by an ARIMA model with seasonality modeled  
5 using a sine term, then Holt-Winters, with the SA<sub>3</sub> providing the least accurate forecasts.  
6  
7 They also considered independent time series, such as rainfall and malaria cases in  
8 neighboring districts, in the models. Medina et al.<sup>30</sup> determined that their Holt-Winters  
9 method provided more accurate forecasts and the accuracy did not deteriorate as rapidly  
10 as with the SA<sub>3</sub> method. Cunha et al.<sup>23</sup> found that their neural network provided more  
11 accurate predictions across all three forecast horizons (3, 6, and 12 months) when  
12 compared to a logistic regression model.  
13  
14  
15  
16  
17  
18  
19  
20  
21  
22  
23

## 24 DISCUSSION

25  
26  
27 Malaria forecasting can be an invaluable tool for malaria control and elimination  
28 efforts. A public health practitioner used a simple method to develop the first forecasts of  
29 malaria, which were used as an early warning system.<sup>1</sup> Forecasting methods for malaria  
30 have advanced since that early work, but the utility of more sophisticated models for  
31 clinical and public health decision-making is not always evident. The accuracy of  
32 forecasts is a critical factor in determining the practical value of a forecasting system.  
33  
34 The variability in methods is a strength of malaria forecasting, as it allows for tailored  
35 approaches to specific settings and contexts. There should also be continued effort to  
36 develop new methods although common forecasting metrics are essential as they will  
37 help determine the optimal approach with existing and future methods.  
38  
39  
40  
41  
42  
43  
44  
45  
46  
47  
48  
49

50  
51 When performing forecasting, it is important to understand the assumptions of  
52 forecast models and understand the advantages and disadvantages of each. Forecast  
53 accuracy should always be measured on reserved data and common forecasting metrics  
54  
55  
56  
57  
58  
59  
60

1  
2  
3 should be used to facilitate comparison between studies. One should explore non-climate  
4  
5 predictors as well as different forecasting approaches based upon the same data.  
6  
7

### 8 **Advantages and disadvantages of forecasting methods**

9

10 The regression approach to time series prediction attempts to model the serial  
11 autocorrelation in the data through the inclusion of autoregressive terms and/or sine and  
12 cosine functions for seasonality. Generalized linear regression models are used  
13 commonly and their main advantages are their flexibility and the intuitive nature of this  
14 approach for many people relative to ARIMA models. For example, the temporal  
15 dynamics observed in time series plots can be feasibly managed in generalized linear  
16 models by including several cyclic factors, interaction terms, and numerous predictors.<sup>39</sup>

17 The main disadvantages are that generalized linear models do not naturally account for  
18 correlation in the errors and the models<sup>40</sup> may need to be complex to capture all the  
19 dynamics of the relationship within a series and between two or more series.<sup>41</sup> Failure to  
20 accurately model serial autocorrelation may bias the estimation of the effect of malaria-  
21 related variables. Crucially, the regression models residuals must be examined for  
22 autocorrelation and it was not always evident that this occurred in the studies we  
23 identified that used this method. Additionally, it was not apparent if any remedial  
24 measures were used to account for the effect of autocorrelation on estimates of variance,  
25 e.g. re-estimating standard errors using heteroskedasticity and autocorrelation consistent  
26 (HAC) estimators.<sup>42</sup>

27  
28  
29  
30  
31  
32  
33  
34  
35  
36  
37  
38  
39  
40  
41  
42  
43  
44  
45  
46  
47  
48  
49  
50  
51 ARIMA models are designed to account for serial autocorrelation in time series;  
52 current values of a series can be explained as a function of past values and past shocks.<sup>41</sup>  
53  
54  
55  
56  
57  
58  
59  
60  
60 With ARIMA models, once the series have been detrended through differencing, any  
remaining seasonality can be modeled as part of additional autoregressive or moving



1  
2  
3 average parameters of a SARIMA model. An advantage of ARIMA models versus GLMs  
4 is that ARIMA models naturally represent features of temporal patterns, such as  
5  
6 seasonality and autocorrelation. As with generalized linear regression models, the  
7  
8 residuals of ARIMA models need to be examined for residual correlation. Also, when  
9  
10 incorporating an input series into the model, pre-whitening should occur prior to the  
11  
12 cross-correlation assessment for the transfer function models. Pre-whitening is when the  
13  
14 residuals from an ARIMA model for the input series are reduced to ‘white noise’ and the  
15  
16 same ARIMA model is applied to the output series.<sup>40</sup> Authors did not always report that  
17  
18 they pre-whitened the series prior to assessing cross-correlations. The relationship  
19  
20 between the two resulting residual series is then estimated by the cross-correlation  
21  
22 function. Without pre-whitening, the estimated cross-correlation function may be  
23  
24 distorted and misleading.  
25  
26  
27  
28  
29  
30

31  
32 Four studies from China used the Grey method for malaria forecasting.<sup>26-28, 31</sup>  
33  
34 This forecasting method is essentially a curve fitting technique based on a smoothed  
35  
36 version of the observed data.<sup>36, 37</sup> The models included in the review were of the basic  
37  
38 form, GM(1,1), which implies that this is a univariate model (malaria counts only) and  
39  
40 the solution is the result of solving a single differential equation. The Grey model is a  
41  
42 curve fitting technique and appears most useful in predicting malaria when using a very  
43  
44 short time series and when there is a strong linear trend in the data. This is due to the  
45  
46 nature of the GM(1,1) model which will always generate either exponentially increasing  
47  
48 or decreasing series.<sup>43</sup> Its value in malaria prediction beyond that of the simpler statistical  
49  
50 modelling approaches is yet to be determined.  
51  
52  
53  
54

55  
56 The approach to prediction differs between mathematical models and other  
57  
58 approaches such as generalized linear models, ARIMA and Grey models. Mathematical  
59  
60

1  
2  
3 models are formulated to reflect transmission dynamics and the parameter values are  
4 typically estimated from laboratory or field data. For the studies included in this review,  
5  
6 the parameters used in mathematical models were constant over time and based upon  
7  
8 laboratory findings, literature, and expert opinion. The disadvantages of mathematical  
9  
10 models include the difficulty in finding appropriate, setting-specific data for the  
11  
12 parameters. Also, the computational complexity of these models increases with the  
13  
14 number of parameters, resulting in the omission of relevant features of malaria dynamics  
15  
16 in order for the model to be manageable.<sup>44</sup>  
17  
18  
19  
20  
21

22 Neural networks have been proven to be useful in their capacity to handle non-  
23  
24 linear relationships as well as a large number of parameters, and also their ability to  
25  
26 detect all possible interactions between predictor variables.<sup>45</sup> Mathematical models and  
27  
28 neural networks are able to capture thresholds or limits on malaria transmission, which  
29  
30 cannot be readily captured by statistical approaches. For example, in generalized linear  
31  
32 models, a small decrease in the temperature leads to a small decrease in malaria  
33  
34 incidence. Neural networks and mathematical models can represent explicitly that there  
35  
36 will be no malaria transmission below a certain temperature. The disadvantages of neural  
37  
38 networks include difficulties in determining how the network is making its decision and  
39  
40 its greater computational burden<sup>46</sup>; both of which depend upon the number of input  
41  
42 parameters included in the model. Additionally, neural networks have a greater  
43  
44 susceptibility to overfitting<sup>45</sup> and several thousand observations are typically required to  
45  
46 fit a neural network with confidence.<sup>46</sup>  
47  
48  
49  
50  
51  
52

53 Researchers have examined many forecasting methods, but published articles tend  
54  
55 to describe the application of a single method to a unique dataset. Direct comparison of  
56  
57 methods would be easier if multiple malaria forecasting methods were applied to the  
58  
59  
60

1  
2  
3 same data. This approach would allow identification of the methods that provide the most  
4 accurate short-term, intermediate, and long-term forecasts, for a given setting and a set of  
5 predictors. It would also allow exploration of gains in forecast accuracy by using a  
6 weighted combination of forecasts from several models and/or methods.<sup>47</sup>  
7  
8  
9

### 10 11 12 **Malaria covariates and measures**

13  
14  
15 It has been suggested that climate and meteorological predictors have greater  
16 predictive power when modelling malaria incidence in areas with unstable transmission  
17 as compared to areas with stable endemicity.<sup>48</sup> It is interesting to note that nearly all of  
18 the models focused narrowly on a small number of environmental predictors despite the  
19 importance of other predictors of malaria incidence, such as land use, bednets, indoor  
20 residual spraying, and antimalarial resistance. This limitation is likely due to the  
21 difficulty in accessing data describing non-environmental determinants of malaria.  
22  
23 Additionally, the findings derived from forecasting models based upon clinical  
24 confirmation of malaria are likely subject to error, due to the poor specificity of clinical  
25 case definitions for malaria.  
26  
27  
28  
29  
30  
31  
32  
33  
34  
35  
36  
37

### 38 **Forecast evaluation**

39  
40  
41 Model selection based upon model fitting criteria such as Akaike's information  
42 criterion, Bayesian information criterion, or the coefficient of determination, are standard  
43 measures considered when choosing a regression model. Using such measures to guide  
44 forecast model selection may result in selecting models with a greater number of  
45 parameters and "over-fitting", which tends to result in inaccurate forecasts.<sup>49</sup> For the  
46 purposes of forecasting, visualizations of forecasts compared to observations and forecast  
47 accuracy metrics, such as the mean absolute forecast error, provide more direct and  
48 intuitive model selection criteria.  
49  
50  
51  
52  
53  
54  
55  
56  
57  
58  
59  
60

1  
2  
3  
4  
5  
6  
7  
8  
9  
10  
11  
12  
13  
14  
15  
16  
17  
18  
19  
20  
21  
22  
23  
24  
25  
26  
27  
28  
29  
30  
31  
32  
33  
34  
35  
36  
37  
38  
39  
40  
41  
42  
43  
44  
45  
46  
47  
48  
49  
50  
51  
52  
53  
54  
55  
56  
57  
58  
59  
60

When choosing how much of the series to reserve for testing the model, it is recommended to reserve at least as much as the maximum forecast horizon.<sup>50</sup> Cross-validation is a more efficient use of data than partitioning a data set into train and test segment, although it is more computational intensive. It is recommended in cross-validation that only prior observations be used for testing a future value.<sup>50</sup>

Various direct measures were used to estimate forecasting error. Absolute measures, such as the mean absolute error, are relevant for measuring accuracy within a particular series but not across series because the magnitude of the mean absolute error depends on the scale of the data.<sup>51</sup> Percent errors, such as mean absolute percent error are scale-independent but are not recommended when the data involves small or 0 counts. In economics, a measure called mean absolute scaled error has been recommended as a forecast-accuracy metric for forecasting.<sup>51</sup> We recommend incorporating mean absolute scaled error into malaria forecast evaluation as this evaluation measure will facilitate comparison between studies, but we also recommend reporting mean absolute error as this metric allows an intuitive interpretation of the errors. These measures should be provided as site-specific for each forecasting horizon, as summary measures for each site, and finally as summary measures for each forecasting horizon.

## Conclusion

Accurate disease predictions and early warning signals of increased disease burden can provide public health and clinical health services with the information needed to strategically implement prevention and control measures. Potential barriers to their usefulness in public health settings include the spatial and temporal resolution of models and accuracy of prediction. Models that produce coarse forecasts may not provide the precision necessary to guide targeted intervention efforts. Additionally,

1  
2  
3 technical skill and lack of readily available data may reduce the feasibility of model  
4  
5 utility in practice, which should be considered in developing malaria forecasting  
6  
7 models if the intent is to apply these models in clinical or public health settings.  
8  
9

10 Applying different forecasting methods to the same data, exploring the predictive  
11  
12 ability of non-environmental variables, and using common forecast accuracy metrics  
13  
14 will allow malaria researchers to compare and improve models and methods, and lead  
15  
16 to the improvement in the quality and public health impact of malaria forecasting.  
17  
18  
19  
20  
21  
22  
23  
24  
25  
26  
27  
28  
29  
30  
31  
32  
33  
34  
35  
36  
37  
38  
39  
40  
41  
42  
43  
44  
45  
46  
47  
48  
49  
50  
51  
52  
53  
54  
55  
56  
57  
58  
59  
60

### **Acknowledgements**

We would like to thank various authors for responding to our questions and also to gratefully acknowledge Lorie Kloda for her assistance in our literature search strategies.

### **Competing interests**

None declared.

### **Funding**

This work was supported by the Canadian Institutes of Health Research Interdisciplinary Capacity Enhanced Team grant number HOA-80072.

### **Contributorship Statement**

Kate Zinszer, Aman Verma, Katia Charland, Timothy Brewer, and David Buckeridge contributed to the study concept and design. Kate Zinszer, Aman Verma, and Zhuoyu Sun contributed to the article review and data abstraction. Kate Zinszer, Aman Verma, Katia Charland, Timothy Brewer, John Brownstein and David Buckeridge contributed to the interpretation of the data, and drafted the manuscript. All authors critically revised the manuscript for important intellectual content and approved final version submitted for publication .

### **Data Sharing Statement**

There is no additional data.

## References

1. Christophers SR. Epidemic malaria of the Punjab: with a note of a method of predicting epidemic years. *Transactions of the Committee for the Study of Malaria in India* 1911;2:17-26.
2. Levac D, Colquhoun H, O'Brien KK. Scoping studies: advancing the methodology. *Implement Sci* 2010;5:69.
3. Adimi F, Soebiyanto RP, Safi N, *et al.* Towards malaria risk prediction in Afghanistan using remote sensing. *Malar J* 2010;9:125. doi:10.1186/1475-2875-9-1259
4. Chatterjee C, Sarkar RR. Multi-step polynomial regression method to model and forecast malaria incidence. *PLoS ONE* 2009;4:e4726. doi:10.1371/journal.pone.0004726
5. Gomez-Elipse A, Otero A, van Herp M, *et al.* Forecasting malaria incidence based on monthly case reports and environmental factors in Karuzi, Burundi, 1997-2003. *Malar J* 2007;6:129. doi:10.1186/1475-2875-6-129
6. Haghdoost AA, Alexander N, Cox J. Modelling of malaria temporal variations in Iran. *Trop Med Int Health* 2008;13:1501-8.
7. Rahman A, Kogan F, Roytman L, *et al.* Modelling and prediction of malaria vector distribution in Bangladesh from remote-sensing data. *Int J Remote Sens* 2011;32:1233-51.
8. Roy SB, Sarkar RR, Somdatta S. Theoretical investigation of malaria prevalence in two Indian cities using the response surface method. *Malar J* 2011;10:301. doi:10.1186/1475-2875-10-301
9. Teklehaimanot HD, Schwartz J, Teklehaimanot A, *et al.* Weather-based prediction of Plasmodium falciparum malaria in epidemic-prone regions of Ethiopia II. *Malar J* 2004;3:44. doi:10.1186/1475-2875-3-44

- 1  
2  
3 10. Xiao D, Long Y, Wang S, *et al.* Spatiotemporal distribution of malaria and the  
4 association between its epidemic and climate factors in Hainan, China. *Malar J*  
5  
6 2010;9:185. doi:10.1186/1475-2875-9-185  
7  
8  
9  
10 11. Yacob M, Swaroop S. Preliminary forecasts of the incidence of malaria in the Punjab.  
11  
12 *Indian Journal of Malariology* 1947;1:491-501.  
13  
14 12. Yan W, Jiang S, Li J, *et al.* Establishment of a dynamic model of malaria outbreak in  
15 Chongqing municipality. *Journal of Tropical Medicine [Guangzhou]* 2007;7:801-3.  
16  
17 13. Abeku TA, De Vlas SJ, Borsboom G, *et al.* Forecasting malaria incidence from  
18 historical morbidity patterns in epidemic-prone areas of Ethiopia: A simple seasonal  
19 adjustment method performs best. *Trop Med Int Health* 2002;7:851-7.  
20  
21 14. Briet OJ, Vounatsou P, Gunawardena DM, *et al.* Models for short term malaria  
22 prediction in Sri Lanka. *Malar J* 2008;7:76. doi:10.1186/1475-2875-7-76  
23  
24 15. Liu J, Qu B, He Q. Epidemiological analysis on malaria incidence in China from  
25 2004 to 2009 by time series model. *Chinese Journal of Vector Biology and Control*  
26 2011;22:134-6.  
27  
28 16. Wangdi K, Singhasivanon P, Silawan T, Lawpoolsri S, White NJ, Kaewkungwal J.  
29 Development of temporal modelling for forecasting and prediction of malaria infections  
30 using time-series and ARIMAX analyses: a case study in endemic districts of Bhutan.  
31  
32 *Malar J* 2010;9:251. doi:10.1186/1475-2875-9-251  
33  
34  
35  
36  
37  
38 17. Wen L, Xu D, Lin M, *et al.* Prediction of malaria incidence in malaria epidemic area  
39 with time series model. *Journal of the Fourth Military Medical University* 2004;25:507-  
40  
41  
42  
43  
44  
45  
46  
47  
48  
49  
50  
51  
52  
53  
54  
55  
56  
57  
58  
59  
60



- 1  
2  
3  
4  
5  
6  
7  
8  
9  
10  
11  
12  
13  
14  
15  
16  
17  
18  
19  
20  
21  
22  
23  
24  
25  
26  
27  
28  
29  
30  
31  
32  
33  
34  
35  
36  
37  
38  
39  
40  
41  
42  
43  
44  
45  
46  
47  
48  
49  
50  
51  
52  
53  
54  
55  
56  
57  
58  
59  
60
19. Zhou S, Huang F, Shen Y. Application of ARIMA model on prediction of malaria incidence. *Journal of Pathogen Biology* 2007;2:284-6.
20. Zhu JM, Tang LH, Zhou SS, *et al.* Study on the feasibility for ARIMA model application to predict malaria incidence in an unstable malaria area. *Chinese Journal of Parasitology and Parasitic Diseases* 2007;25:232-6.
21. Gaudart J, Toure O, Dessay N, *et al.* Modelling malaria incidence with environmental dependency in a locality of Sudanese savannah area, Mali. *Malar J* 2009;8:61.  
doi:10.1186/1475-2875-8-61
22. Laneri K, Bhadra A, Ionides EL, *et al.* Forcing versus feedback: epidemic malaria and monsoon rains in northwest India. *PLoS Comput Biol* 2010;6.  
doi:10.1371/journal.pcbi.1000898
23. Cunha GB, Luitgards-Moura JF, Naves ELM, *et al.* Use of an artificial neural network to predict the incidence of malaria in the city of Canta, state of Roraima. *Revista da Sociedade Brasileira de Medicina Tropical* 2010;43:567-70.
24. Gao CY, Xiong HY, Yi D, *et al.* Study on meteorological factors-based neural network model of malaria. *Chinese Journal of Epidemiology* 2003;24:831-4.
25. Kiang R, Adimi F, Soika V, *et al.* Meteorological, environmental remote sensing and neural network analysis of the epidemiology of malaria transmission in Thailand. *Geospat Health* 2006;1:71-84.
26. Fang Y, Deng D, Gu ZC, *et al.* Interval division, forecasting and decline tendency estimation model of malaria incidence in Xuzhou City. *Chinese Journal of Parasitology and Parasitic Diseases* 1991;9:284-6.

- 1  
2  
3 27. Gao S, Liu J, Zhang R, *et al.* Establishment and estimation of a GM (1,1) grey model  
4 for forecasting of malaria epidemic situation in Shenzhen Longgang areas. *Journal of*  
5  
6 *Pathogen Biology* 2007;2:357-9.  
7  
8  
9  
10 28. Guo H, Ding H, Qu B, *et al.* A study on the trend of malaria incidence in China in the  
11 recent 20 years with GM (1,1). *Journal of Tropical Medicine [Guangzhou]* 2011;11:639-  
12  
13 40.  
14  
15  
16  
17 29. Gill CA. The forecasting of malaria epidemics with special reference to the malaria  
18 forecast for the year 1926. *Indian Journal of Medical Research* 1927;15:265-76.  
19  
20  
21 30. Medina DC, Findley SE, Guindo B, *et al.* Forecasting non-stationary diarrhea, acute  
22 respiratory infection, and malaria time-series in Niono, Mali. *PLoS ONE* 2007;2.  
23  
24  
25  
26  
27 doi:10.1371/journal.pone.0001181  
28  
29 31. Xu X, Jin X. The application of GM (1,1) grey model in the forecasting of malaria  
30 epidemic situation. *Chinese Journal of Parasitic Disease Control* 2005;18:178-9.  
31  
32  
33 32. Box GEP, Jenkins GM, Reinsel GC. *Time series analysis: forecasting and control.*  
34  
35  
36 Hoboken, NJ: John Wiley & Sons, 2008.  
37  
38 33. Chatfield C. The Holt-Winters forecasting procedure. *Journal of the Royal Statistical*  
39  
40  
41 *Society* 1978;27:264-79.  
42  
43 34. MacDonald G. *The epidemiology and control of malaria.* London: Oxford University  
44  
45 Press, 1957.  
46  
47 35. Anderson JA. *An introduction to neural networks.* Cambridge, MA: The MIT Press,  
48  
49  
50 1995.  
51  
52 36. Deng JL. Introduction to Grey system theory. *Journal of Grey System* 1989;1:1-24.  
53  
54 37. Lin KH, Liu BD. A gray system modelling approach to the prediction of calibration  
55  
56  
57 intervals. *IEEE Transactions of Instrumentation and Measurement* 2005;54:297-305.  
58  
59  
60

- 1  
2  
3 38. Chatfield C. Neural networks: forecasting breakthrough or passing fad? *International*  
4 *Journal of Forecasting* 1993;9:1-3.  
5  
6  
7  
8 39. Darlington RB. *A comparison to ARIMA*.  
9  
10 <http://www.psych.cornell.edu/darlington/series/series2.htm> (accessed 30 May 2012).  
11  
12 40. Chatfield C. *The analysis of time series: an introduction*. London: Chapman & Hall,  
13 2004.  
14  
15  
16  
17 41. Shumway RH, Stoffer DS. *Time series analysis and its applications: with R*  
18 *examples*. New York: Springer, 2006.  
19  
20  
21  
22 42. Zeileis A. Econometric computing with HC and HAC covariance matrix estimators.  
23 *Journal of Statistical Software* 2004;11:1-17.  
24  
25  
26  
27 43. Tseng FM, Yu HC, Tzeng GH. Applied hybrid grey model to forecast seasonal time  
28 series. *Technological Forecasting and Social Change* 2001;67:291-302.  
29  
30  
31  
32 44. Koella JC. On the use of mathematical models of malaria transmission. *Acta Trop*  
33 1991;49:1-25.  
34  
35  
36  
37 45. Tu JV. Advantages and disadvantages of using artificial neural networks versus  
38 logistic regression for predicting medical outcomes. *J Clin Epidemiol* 1996;49:1225-31.  
39  
40  
41 46. Chatfield C. Forecasting in the 1990s. *Journal of the Royal Statistical Society*  
42 1997;46:461-73.  
43  
44  
45  
46 47. Jose VRR, Winkler RL. Simple robust averages of forecasts: Some empirical results.  
47 *International Journal of Forecasting* 2008;24:163-9.  
48  
49  
50  
51 48. Hay SI, Rogers DJ, Shanks GD, *et al*. Malaria early warning in Kenya. *Trends*  
52 *Parasitol* 2001;17:95-9.  
53  
54  
55  
56 49. Shmueli G. To Explain or to predict? *Statistical Science* 2010;25:289-310.  
57  
58  
59  
60

1  
2  
3 50. Hyndman RJ, Athanasopoulos G. *Forecasting: principles and practice*. 2012.  
4  
5  
6 <http://otexts.com/fpp/> (accessed 3 May 2012).

7  
8 51. Hyndman RJ, Koehler AB. Another look at measures of forecast accuracy.  
9  
10 *International Journal of Forecasting* 2006;22:679-88.  
11  
12  
13  
14  
15  
16  
17  
18  
19  
20  
21  
22  
23  
24  
25  
26  
27  
28  
29  
30  
31  
32  
33  
34  
35  
36  
37  
38  
39  
40  
41  
42  
43  
44  
45  
46  
47  
48  
49  
50  
51  
52  
53  
54  
55  
56  
57  
58  
59  
60

For peer review only

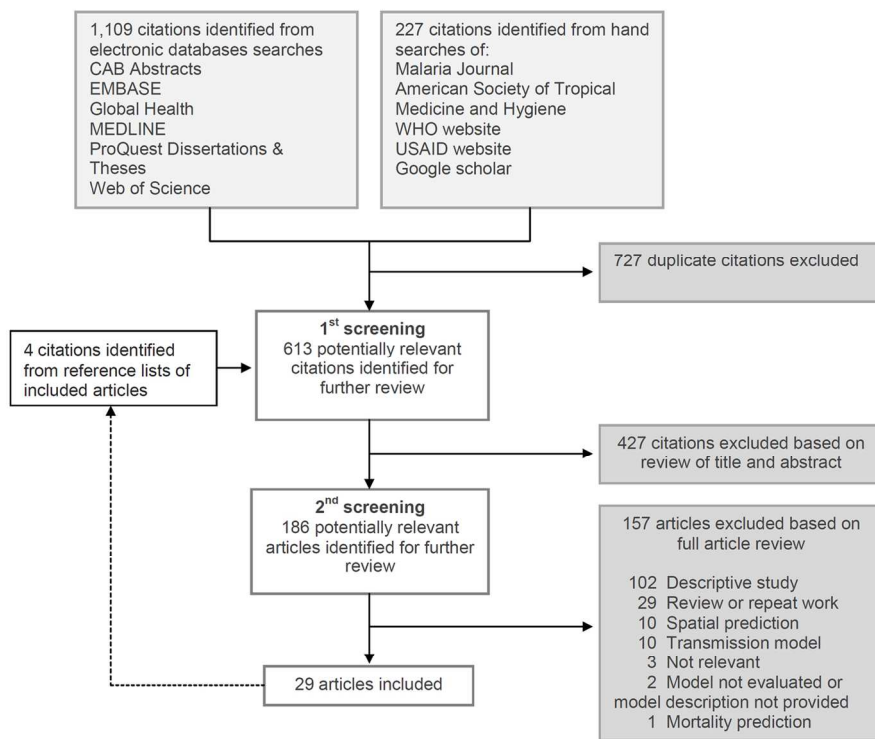

Figure 1. Flow of literature searches and screening process

152x137mm (300 x 300 DPI)

only



## A scoping review of malaria forecasting: Past work and future directions

|                                 |                                                                                                                                                                                                                                                                                                                                                                                                                                                                                                                                                                                                                                                                                                                                                                                                                                                                                                                            |
|---------------------------------|----------------------------------------------------------------------------------------------------------------------------------------------------------------------------------------------------------------------------------------------------------------------------------------------------------------------------------------------------------------------------------------------------------------------------------------------------------------------------------------------------------------------------------------------------------------------------------------------------------------------------------------------------------------------------------------------------------------------------------------------------------------------------------------------------------------------------------------------------------------------------------------------------------------------------|
| Journal:                        | <i>BMJ Open</i>                                                                                                                                                                                                                                                                                                                                                                                                                                                                                                                                                                                                                                                                                                                                                                                                                                                                                                            |
| Manuscript ID:                  | bmjopen-2012-001992.R1                                                                                                                                                                                                                                                                                                                                                                                                                                                                                                                                                                                                                                                                                                                                                                                                                                                                                                     |
| Article Type:                   | Research                                                                                                                                                                                                                                                                                                                                                                                                                                                                                                                                                                                                                                                                                                                                                                                                                                                                                                                   |
| Date Submitted by the Author:   | 22-Oct-2012                                                                                                                                                                                                                                                                                                                                                                                                                                                                                                                                                                                                                                                                                                                                                                                                                                                                                                                |
| Complete List of Authors:       | Zinszer, Kate; McGill University, Epidemiology, Biostatistics, and Occupational Health<br>Verman, Aman; McGill University, Epidemiology, Biostatistics, and Occupational Health<br>Charland, Katia; McGill University, Epidemiology, Biostatistics, and Occupational Health; Harvard University, Harvard-MIT Division of Health Sciences and Technology<br>Brewer, Timothy; McGill University, Epidemiology, Biostatistics, and Occupational Health; McGill University, Faculty of Medicine<br>Brownstein, John; Harvard University, Harvard-MIT Division of Health Sciences and Technology; Harvard University, Division of Emergency Medicine<br>Sun, Zhuoyu; McGill University, Epidemiology, Biostatistics, and Occupational Health<br>Buckeridge, David; McGill University, Epidemiology, Biostatistics, and Occupational Health; Agence de la Santé et des services Sociaux de Montréal, Direction de santé publique |
| <b>Primary Subject Heading</b>: | Epidemiology                                                                                                                                                                                                                                                                                                                                                                                                                                                                                                                                                                                                                                                                                                                                                                                                                                                                                                               |
| Secondary Subject Heading:      | Infectious diseases, Public health, Global health                                                                                                                                                                                                                                                                                                                                                                                                                                                                                                                                                                                                                                                                                                                                                                                                                                                                          |
| Keywords:                       | Epidemiology < INFECTIOUS DISEASES, INFECTIOUS DISEASES, Public health < INFECTIOUS DISEASES, Epidemiology < TROPICAL MEDICINE                                                                                                                                                                                                                                                                                                                                                                                                                                                                                                                                                                                                                                                                                                                                                                                             |
|                                 |                                                                                                                                                                                                                                                                                                                                                                                                                                                                                                                                                                                                                                                                                                                                                                                                                                                                                                                            |

SCHOLARONE™  
Manuscripts

**Title:** A scoping review of malaria forecasting: Past work and future directions

**Authors:** Kate Zinszer<sup>1,2</sup>, Aman D. Verma<sup>1,2</sup>, Katia Charland<sup>1,2,3,4</sup>, Timothy F. Brewer<sup>1,5</sup>, John S. Brownstein<sup>1,3,4,5</sup>, Zhuoyu Sun<sup>1</sup>, David L. Buckeridge<sup>1,2,6</sup>

**Addresses & Affiliations:**

<sup>1</sup>Department of Epidemiology, Biostatistics & Occupational Health, McGill University, Montreal, Canada

<sup>2</sup>Surveillance Lab, Clinical and Health Informatics Research Group, McGill University, Montreal, Canada

<sup>3</sup>Children's Hospital Informatics Program at the Harvard-MIT Division of Health Sciences and Technology, Harvard University, Boston, USA

<sup>4</sup>Division of Emergency Medicine, Children's Hospital Boston, Boston, USA

<sup>5</sup>Faculty of Medicine, McGill University, Montreal, Canada

<sup>6</sup>Agence de la Santé et des services Sociaux de Montréal, Direction de santé publique, 3725 Saint-Denis Street, Montréal, Québec, Canada H2L 1M3

**Corresponding author:** Kate Zinszer; Surveillance Lab, Clinical and Health Informatics Research Group, McGill University, 1040 Pine Avenue West, Montreal, Quebec, Canada H3A 1A3 kate.zinszer@mail.mcgill.ca, phone: 514-934-1934 x 32983, fax: 514-843-1551

**Key words:** malaria, epidemiology, forecasting, methods, review

**Word count:** 3,907

## ABSTRACT

**Objectives:** There is a growing body of literature on malaria forecasting methods and the objective of our review is to identify and assess methods, including predictors, used to forecast malaria.

**Design:** Scoping review. Two independent reviewers searched information sources, assessed studies for inclusion and extracted data from each study.

**Information sources:** Search strategies were developed and the following databases were searched: CAB Abstracts, EMBASE, Global Health, MEDLINE, ProQuest Dissertations & Theses, and Web of Science. Key journals and websites were also manually searched.

**Eligibility criteria for included studies:** We included studies that forecasted incidence, prevalence, or epidemics of malaria over time. A description of the forecasting model and an assessment of the forecast accuracy of the model were requirements for inclusion.

Studies were restricted to human populations and to autochthonous transmission settings.

**Results:** We identified 29 different studies that met our inclusion criteria for this review.

The forecasting approaches included statistical modelling, mathematical modelling, and machine learning methods. Climate-related predictors were used consistently in forecasting models, with the most common predictors being rainfall, relative humidity, temperature, and the normalized difference vegetation index. Model evaluation was typically based upon a reserved portion of data and accuracy was measured in a variety of ways including mean squared error and correlation coefficients. We could not compare the forecast accuracy of models from the different studies as the evaluation measures differed across the studies.



1  
2  
3 **Conclusions:** Applying different forecasting methods to the same data, exploring the  
4 predictive ability of non-environmental variables, including transmission reducing  
5 interventions, and using common forecast accuracy measures will allow malaria  
6 researchers to compare and improve models and methods, which should improve the  
7 quality of malaria forecasting.  
8  
9

## 10 **ARTICLE SUMMARY**

### 11 **Article focus**

- 12 • Accurate predictions of malaria can provide public health and clinical health services  
13 with the information needed to strategically implement prevention and control  
14 measures.  
15
- 16 • The diversity in forecasting accuracy measures and the use of scale-dependent  
17 measures limits the comparability of forecasting results, making it difficult to identify  
18 the optimal predictors and methods for malaria forecasting.  
19
- 20 • The objective was to identify and assess methods, including predictors, used to  
21 forecast malaria.  
22  
23  
24  
25  
26  
27  
28  
29  
30  
31  
32  
33  
34  
35  
36  
37  
38

### 39 **Key messages**

- 40 • When performing forecasting, it is important to understand the assumptions of  
41 each method as well as the associated advantages and disadvantages.  
42
- 43 • Common accuracy measures are essential as they will facilitate the comparison of  
44 findings between studies and methods.  
45
- 46 • Applying different forecasting methods to the same data and exploring the  
47 predictive ability of non-environmental variables, including transmission reducing  
48  
49  
50  
51  
52  
53  
54  
55  
56  
57  
58  
59  
60

1  
2  
3 interventions, are necessary next steps as they will help determine the optimal  
4  
5 approach and predictors for malaria forecasting.  
6  
7

### 8 **Strengths and limitations of this study**

9

- 10 • The strength of this review is that it is the first review to systematically assess  
11 malaria forecasting methods and predictors, and the recommendations in the  
12 review, if followed, should lead to improvement in the quality of malaria  
13 forecasting.  
14  
15
- 16 • A limitation of a literature review is that unpublished methods, if any, are omitted  
17 from this review.  
18  
19  
20  
21  
22  
23  
24  
25  
26  
27  
28  
29  
30  
31  
32  
33  
34  
35  
36  
37  
38  
39  
40  
41  
42  
43  
44  
45  
46  
47  
48  
49  
50  
51  
52  
53  
54  
55  
56  
57  
58  
59  
60

## INTRODUCTION

In 1911, Christophers<sup>1</sup> developed an early warning system for malaria epidemics in Punjab based upon rainfall, fever-related deaths, and wheat prices. Since that initial system, researchers and practitioners have continued to search for determinants of spatial and temporal variability of malaria to improve systems for forecasting disease burden. Malaria forecasting is now conducted in many countries and typically uses data on environmental risk factors, such as climatic conditions, to forecast incidence for a specific geographic area over a certain period of time.

Malaria can be forecasting using an assortment of methods and significant malaria predictors have been identified in a variety of settings. Our objective was to identify and assess methods, including predictors, used to forecast malaria. This review is intended to serve as a resource for malaria researchers and practitioners to inform future forecasting studies.

## METHODS

We included in our scoping review studies that forecasted incidence, prevalence, or epidemics of malaria over time. Whereas a systematic review is guided by a highly focused research question, a scoping review covers a subject area comprehensively by examining the extent, range, and nature of research activity on a topic.<sup>2</sup> The studies had to use models that included prior malaria incidence, prevalence, or epidemics as a predictor. A description of the forecasting model and an assessment of the forecast accuracy of the model were requirements for inclusion. Studies were restricted to human populations and to autochthonous transmission settings. We excluded studies that provided only spatial predictions, exploratory analysis (e.g., assessing temporal correlations), mortality predictions, and/or individual-level transmission modelling.

1  
2  
3 Commentaries, descriptive reports, or studies that did not include original research were  
4  
5 also excluded. Additionally, for studies that were related (e.g., same setting and same  
6  
7 methods with different time periods), the study with the most comprehensive data was  
8  
9 included in the review.  
10  
11

12  
13 A review protocol was developed and electronic search strategies were guided by  
14  
15 a librarian experienced in systematic and scoping reviews. Papers were identified using  
16  
17 medical subject headings and key word combinations and truncations: [“forecast\*” or  
18  
19 “predictive model\*” or “prediction model\*” or “time serie\*” or “time-serie\*”; AND  
20  
21 “malaria\*”]. The searches were not restricted by year or language although our searches  
22  
23 were restricted by the historical time periods of the databases. The citation searches  
24  
25 began on April 18, 2011 and the final citation search was conducted on May 29, 2012.  
26  
27 We searched the following databases: CAB Abstracts (1910-2012 Week 20), EMBASE  
28  
29 (1947-2012 May 28), Global Health (1910-April 2012), MEDLINE (1948-May Week 3  
30  
31 2012), ProQuest Dissertations & Theses (1861-May 29, 2012), and Web of Science  
32  
33 (1899-May 28, 2012). We performed manual searches of the Malaria Journal (2000-May  
34  
35 29, 2012) and the American Journal of Tropical Medicine and Hygiene (1921-May  
36  
37 2012). Grey literature was also searched using Google Scholar, based upon the same key  
38  
39 words used to search the databases. Additionally, the websites of the World Health  
40  
41 Organization and the United States Agency for International Development were also  
42  
43 examined for any relevant literature. To ensure that all appropriate references were  
44  
45 identified, hand searching of reference lists of all included studies was conducted and any  
46  
47 potentially relevant references were incorporated into the review process.  
48  
49  
50  
51  
52  
53  
54

55 The citations were imported into EndNote X5 (Thomas Reuters) for management.  
56  
57 Two main reviewers (KZ, AV) examined all citations in the study selection process with  
58  
59  
60

1  
2  
3 the exception of articles in Chinese, which were reviewed by a third reviewer (ZS). The  
4  
5 first stage of review involved each reviewer independently identifying potentially  
6  
7 relevant studies based upon information provided in the title and abstract. If it was  
8  
9 uncertain whether to include or exclude a study during the first stage of review, the  
10  
11 citation was kept and included in the full article review.  
12  
13

14  
15 The second stage of review involved each reviewer independently identifying  
16  
17 potentially relevant studies based upon full article review; data abstraction occurred for  
18  
19 those articles that met the inclusion criteria. From each study, we abstracted the  
20  
21 following: setting, outcome, covariates, data source(s), time frame of observed data,  
22  
23 forecasting and model evaluation methodologies, final models and associated measures  
24  
25 of prediction accuracy. Quality of the included studies was not assessed as the objective  
26  
27 was to conduct a scoping review and not a systematic review. Any discordance among  
28  
29 the reviewers regarding inclusion or exclusion of studies or with respect to the  
30  
31 information abstracted from the included studies was resolved by consultation with  
32  
33 another author (DB).  
34  
35  
36  
37

## 38 **RESULTS**

39  
40 Our search identified 613 potentially relevant articles for the scoping review after  
41  
42 duplicate citations were removed (figure 1). We identified 29 different studies that met  
43  
44 our inclusion criteria for this review; they are described briefly in table 1. Malaria  
45  
46 forecasting has been conducted in 13 different countries with China as the most frequent  
47  
48 site of malaria forecasting. The size of the geographic region of study ranged from  
49  
50 municipal level to larger administrative divisions such as country and provinces or  
51  
52  
53  
54  
55  
56  
57  
58  
59  
60

**Table 1. Characteristics of malaria forecasting studies included in review (n=29)**

| Authors<br>(reference no.)            | Population and setting                                                                        | Model specifics                                                                                               | Malaria<br>outcome            | No. of data points used<br>for training/testing                         | Evaluation measure                                                                     |
|---------------------------------------|-----------------------------------------------------------------------------------------------|---------------------------------------------------------------------------------------------------------------|-------------------------------|-------------------------------------------------------------------------|----------------------------------------------------------------------------------------|
| <i>Regression forecasting studies</i> |                                                                                               |                                                                                                               |                               |                                                                         |                                                                                        |
| Adimi et al. <sup>3</sup>             | Community health post data from 2004-7 for 23 provinces in Afghanistan; clinical confirmation | 23 linear regressions (1 for each province); included autoregressive, seasonal and trend parameters           | Monthly cases                 | 31/6 (varied between provinces but last 6 months used only for testing) | Root mean squared error & absolute difference                                          |
| Chatterjee and Sarkar <sup>4</sup>    | Municipal data for 2002-5 for Chennai city, India; microscopic confirmation                   | Logistic regression; polynomial and autoregressive parameters                                                 | Monthly slide positivity rate | 36/1                                                                    | 95% CI (for predicted value and compared to observed)                                  |
| Gomez-Elipe et al. <sup>5</sup>       | Health service data from 1997-2003 for Karuzi province, Burundi; clinical confirmation        | Linear regression; adjusted for population, lagged weather covariates, autoregressive and seasonal parameters | Monthly incidence             | 60/24; 1 month ahead forecasts                                          | 95% CI, correlation, p-value trend line of difference (between predicted and observed) |

1  
2  
3  
4  
5  
6  
7  
8  
9  
10  
11  
12  
13  
14  
15  
16  
17  
18  
19  
20  
21  
22  
23  
24  
25  
26  
27  
28  
29  
30  
31  
32  
33  
34  
35  
36  
37  
38  
39  
40  
41  
42  
43  
44  
45  
46  
47  
48  
49

|                                |                                                                                                       |                                                                                                                                                            |                                                  |                                                  |                                                              |
|--------------------------------|-------------------------------------------------------------------------------------------------------|------------------------------------------------------------------------------------------------------------------------------------------------------------|--------------------------------------------------|--------------------------------------------------|--------------------------------------------------------------|
| Haghdooost et al. <sup>6</sup> | District health centre data from 1994-2001 for Kahnooj District, Iran; microscopic confirmation       | Separate Poisson regressions for <i>P. vivax</i> and <i>P. falciparum</i> ; population offset, lagged weather covariates, seasonality and trend parameters | 10-day cases                                     | 213/73                                           | Average percent error                                        |
| Rahman et al. <sup>7</sup>     | Hospital data from 1992-2001 for all divisions of Bangladesh; clinical confirmation                   | 4 linear regressions (1 for each administrative division and 1 for all of Bangladesh); environmental covariate for weeks of highest correlation            | Yearly cases                                     | 10, 1 year was removed from series at a time     | Root mean squared error & relative bias (observed-predicted) |
| Roy et al. <sup>8</sup>        | Municipal data for Chennai city (2002-4) and Mangalore city (2003-7), India; microscopic confirmation | 2 linear regressions (1 for each city); adjusted for population, lagged weather covariates, autoregressive term, interaction terms, polynomial             | Monthly SPR (Chennai), monthly cases (Mangalore) | 28/8 (Chennai), 48/12 (Mangalore); 1 month ahead | 95% CI                                                       |

|    |                           |                       |                     |              |                           |
|----|---------------------------|-----------------------|---------------------|--------------|---------------------------|
| 1  |                           |                       |                     |              |                           |
| 2  |                           |                       |                     |              |                           |
| 3  |                           |                       |                     |              |                           |
| 4  |                           |                       |                     |              |                           |
| 5  |                           |                       | terms               |              |                           |
| 6  |                           |                       |                     |              |                           |
| 7  | Teklehaimanot et          | Health facility data  | 10 Poisson          | Weekly cases | 572 (varied between       |
| 8  | al. <sup>9</sup>          | from 1990-2000 for    | regressions (1 for  |              | districts, training &     |
| 9  |                           | all districts in      | each district);     |              | testing); 52 weeks        |
| 10 |                           | Ethiopia; microscopic | lagged weather      |              | (year) were removed       |
| 11 |                           | confirmation          | covariates,         |              | from series at a time; 1- |
| 12 |                           |                       | autoregressive      |              | 4 week ahead forecasts    |
| 13 |                           |                       | term, time trend    |              |                           |
| 14 |                           |                       | and indicator       |              |                           |
| 15 |                           |                       | covariates          |              |                           |
| 16 |                           |                       | for week of the     |              |                           |
| 17 |                           |                       | year                |              |                           |
| 18 |                           |                       |                     |              |                           |
| 19 |                           |                       |                     |              |                           |
| 20 |                           |                       |                     |              |                           |
| 21 | Xiao et al. <sup>10</sup> | Medical and health    | Poisson             | Monthly      | 144/12                    |
| 22 |                           | unit data from 1995-  | regression; lagged  | incidence    |                           |
| 23 |                           | 2007 for Hainan       | weather covariates, |              | T-test (predictive value  |
| 24 |                           | province, China;      | autoregressive      |              | significantly different   |
| 25 |                           | microscopic           | term                |              | than actual)              |
| 26 |                           | confirmation          |                     |              |                           |
| 27 |                           |                       |                     |              |                           |
| 28 |                           |                       |                     |              |                           |
| 29 |                           |                       |                     |              |                           |
| 30 | Yacob and                 | Medical data from     | 19 linear           | Seasonal     |                           |
| 31 | Swaroop <sup>11</sup>     | 1944-6 for all health | regressions (1 for  | epidemic     | Coefficient of            |
| 32 |                           | districts in Punjab;  | each district);     | figure*      | correlation (between      |
| 33 |                           | clinical confirmation | include             |              | actual and predicted      |
| 34 |                           |                       | coefficients of     |              | epidemic figure)          |
| 35 |                           |                       | correlation         |              |                           |
| 36 |                           |                       | between rainfall    |              |                           |
| 37 |                           |                       | and epidemic        |              |                           |
| 38 |                           |                       | figures from 1914   |              |                           |
| 39 |                           |                       | to 1943             |              |                           |
| 40 |                           |                       |                     |              |                           |
| 41 |                           |                       |                     |              |                           |
| 42 |                           |                       |                     |              |                           |
| 43 |                           |                       |                     |              |                           |
| 44 |                           |                       |                     |              |                           |
| 45 |                           |                       |                     |              |                           |
| 46 |                           |                       |                     |              |                           |
| 47 |                           |                       |                     |              |                           |
| 48 |                           |                       |                     |              |                           |
| 49 |                           |                       |                     |              |                           |



1  
2  
3  
4  
5  
6  
7  
8  
9  
10  
11  
12  
13  
14  
15  
16  
17  
18  
19  
20  
21  
22  
23  
24  
25  
26  
27  
28  
29  
30  
31  
32  
33  
34  
35  
36  
37  
38  
39  
40  
41  
42  
43  
44  
45  
46  
47  
48  
49

|                                  |                                                                                                          |                                                                                                                                                                       |                                          |                                                                                                                    |                                                              |
|----------------------------------|----------------------------------------------------------------------------------------------------------|-----------------------------------------------------------------------------------------------------------------------------------------------------------------------|------------------------------------------|--------------------------------------------------------------------------------------------------------------------|--------------------------------------------------------------|
| Yan et al. <sup>12</sup>         | Municipal data from 1951-2001 for Chongquin city, China                                                  | Linear regression; logarithm curve                                                                                                                                    | Yearly cases                             | 50/1                                                                                                               | Visual inspection of predicted within range of actual values |
| <i>ARIMA forecasting studies</i> |                                                                                                          |                                                                                                                                                                       |                                          |                                                                                                                    |                                                              |
| Abeku et al. <sup>13</sup>       | Health clinics data from 1986-99 for 20 areas in Ethiopia; mixture of microscopic and clinical confirmed | 20 models (1 for each area) compared approaches: Overall average, seasonal average, seasonal adjustment, ARIMA                                                        | Monthly cases                            | 168/12 (varied between areas but last 12 months only used for testing); 1-12 month ahead forecasts                 | Average forecast error                                       |
| Briët et al. <sup>14</sup>       | Health facility data from 1972-2005 for all districts in Sri Lanka; microscopic confirmation             | 25 models (1 for each district) compared approaches: Holt-Winters, ARIMA (seasonality assessed with fixed effects or harmonics) and SARIMA; lagged weather covariates | Monthly cases of malaria slide positives | 180/204 (varied between districts but approximately 50% of series reserved for testing); 1-4 month ahead forecasts | Mean absolute relative error                                 |
| Liu et al. <sup>15</sup>         | Data from 2004-10                                                                                        | SARIMA                                                                                                                                                                | Monthly                                  | 72/12                                                                                                              | Visual (plot of                                              |

|                             |                                                                                                   |                                                                              |                         |                                          |                                         |
|-----------------------------|---------------------------------------------------------------------------------------------------|------------------------------------------------------------------------------|-------------------------|------------------------------------------|-----------------------------------------|
|                             | for China                                                                                         |                                                                              | incidence               |                                          | predicted vs. observed)                 |
| Wangdi et al. <sup>16</sup> | Health center data from 1994-2008 for 7 districts in Bhutan; microscopic and antigen confirmation | 7 models (1 for each district): SARIMA and ARIMAX; lagged weather covariates | Monthly cases           | 144/24                                   | Mean average percent error              |
| Wen et al. <sup>17</sup>    | Data from 1991-2002 for Wanning County, China                                                     | SARIMA                                                                       | Monthly incidence       | 252/12                                   | 95% CI                                  |
| Zhang et al. <sup>18</sup>  | CDC data from 1959-79 for Jinan city, China; clinical confirmation                                | SARIMA; lagged weather covariates                                            | Monthly cases           | 84/120 (removed 1967 & 1968 from series) | Visual (plot of predicted vs. observed) |
| Zhou et al. <sup>19</sup>   | Data from 1996-2007 for Huaiyuan County, China; microscopic and clinical confirmation             | SARIMA                                                                       | Monthly incidence       | 108/12                                   | Average error                           |
| Zhu et al. <sup>20</sup>    | Data from 1998-2007 for Huaiyuan and Tongbai counties, China                                      | SARIMA                                                                       | Monthly incidence rates | 84/24; 1-12 month ahead forecasts        | 95% CI & error                          |

1  
2  
3  
4  
5  
6  
7  
8  
9  
10  
11  
12  
13  
14  
15  
16  
17  
18  
19  
20  
21  
22  
23  
24  
25  
26  
27  
28  
29  
30  
31  
32  
33  
34  
35  
36  
37  
38  
39  
40  
41  
42  
43  
44  
45  
46  
47  
48  
49

*Mathematical forecasting studies*

|                              |                                                                                                                                              |                                                                                                               |                                                                                                 |                                                                     |                                                          |
|------------------------------|----------------------------------------------------------------------------------------------------------------------------------------------|---------------------------------------------------------------------------------------------------------------|-------------------------------------------------------------------------------------------------|---------------------------------------------------------------------|----------------------------------------------------------|
| Gaudart et al. <sup>21</sup> | Data from cohort of children from 1996-2000 in Bancoumana (municipality), Mali from 1996-2006; microscopic confirmation                      | VSEIRS model                                                                                                  | Monthly incidence rate                                                                          | 60 (training & testing); 15 day, 1 month, 2 month, season forecasts | Mean absolute percentage error & root mean squared error |
| Laneri et al. <sup>22</sup>  | Health centre data (passive and active surveillance) for Kutch (1987-2007) and Balmer (1985-2005) Districts, India; microscopic confirmation | 2 models (1 for each district); compared 2 types of VSEIRS model to linear and negative binominal regressions | Monthly incidence for parameter estimation; Seasonal totals (Sept-Dec) for epidemic forecasting | 240 (training & testing); 1 to 4 month ahead forecasts              | Weighted mean square error & prediction likelihood       |

*Neural network forecast studies*

|                            |                                                                                         |                                              |                   |                                      |                                    |
|----------------------------|-----------------------------------------------------------------------------------------|----------------------------------------------|-------------------|--------------------------------------|------------------------------------|
| Cunha et al. <sup>23</sup> | Ministry of Health data from 2003-9 for Cornwall City, Brazil; microscopic confirmation | Compared neural network to linear regression | Monthly cases     | 72/12; 3, 6, and 12 months forecasts | Absolute error & mean square error |
| Gao et al. <sup>24</sup>   | Data from 1994-9 for Honghe State, China                                                | Neural network                               | Monthly incidence | 48/12                                | Percent error                      |

|    |                            |                                                                                              |                                                                                                 |                            |       |                                                                                |
|----|----------------------------|----------------------------------------------------------------------------------------------|-------------------------------------------------------------------------------------------------|----------------------------|-------|--------------------------------------------------------------------------------|
| 1  |                            |                                                                                              |                                                                                                 |                            |       |                                                                                |
| 2  |                            |                                                                                              |                                                                                                 |                            |       |                                                                                |
| 3  |                            |                                                                                              |                                                                                                 |                            |       |                                                                                |
| 4  |                            |                                                                                              |                                                                                                 |                            |       |                                                                                |
| 5  |                            |                                                                                              |                                                                                                 |                            |       |                                                                                |
| 6  |                            |                                                                                              |                                                                                                 |                            |       |                                                                                |
| 7  |                            |                                                                                              |                                                                                                 |                            |       |                                                                                |
| 8  | Kiang et al. <sup>25</sup> | Hospital and clinic data from 1994-2001 for 19 provinces, Thailand; microscopic confirmation | 19 neural networks (1 for each province); various architectures used (varied by province)       | Monthly incidence          | 84/12 | Root mean square error                                                         |
| 9  |                            |                                                                                              |                                                                                                 |                            |       |                                                                                |
| 10 |                            |                                                                                              |                                                                                                 |                            |       |                                                                                |
| 11 |                            |                                                                                              |                                                                                                 |                            |       |                                                                                |
| 12 |                            |                                                                                              |                                                                                                 |                            |       |                                                                                |
| 13 |                            |                                                                                              |                                                                                                 |                            |       |                                                                                |
| 14 |                            |                                                                                              |                                                                                                 |                            |       |                                                                                |
| 15 |                            |                                                                                              |                                                                                                 |                            |       |                                                                                |
| 16 |                            |                                                                                              |                                                                                                 |                            |       |                                                                                |
| 17 |                            |                                                                                              | <i>Other forecasting methods</i>                                                                |                            |       |                                                                                |
| 18 |                            |                                                                                              |                                                                                                 |                            |       |                                                                                |
| 19 | Fang et al. <sup>26</sup>  | Data from 1956-88 for Xuzhou City, China                                                     | Grey and Grey Verhulst models (1,1)                                                             | Yearly incidence           | 30/2  | Percent error                                                                  |
| 20 |                            |                                                                                              |                                                                                                 |                            |       |                                                                                |
| 21 |                            |                                                                                              |                                                                                                 |                            |       |                                                                                |
| 22 |                            |                                                                                              |                                                                                                 |                            |       |                                                                                |
| 23 |                            |                                                                                              |                                                                                                 |                            |       |                                                                                |
| 24 | Gao et al. <sup>27</sup>   | Data from 1998-2005 for Longgang District, China                                             | Grey model (1,1)                                                                                | Yearly incidence           | 6/1   | Error & percent error                                                          |
| 25 |                            |                                                                                              |                                                                                                 |                            |       |                                                                                |
| 26 |                            |                                                                                              |                                                                                                 |                            |       |                                                                                |
| 27 |                            |                                                                                              |                                                                                                 |                            |       |                                                                                |
| 28 |                            |                                                                                              |                                                                                                 |                            |       |                                                                                |
| 29 | Guo et al. <sup>28</sup>   | Data from 1988-2010 China                                                                    | Grey model (1,1)                                                                                | Yearly incidence           | 21/2  | Visual (plot of predicted vs. observed)                                        |
| 30 |                            |                                                                                              |                                                                                                 |                            |       |                                                                                |
| 31 |                            |                                                                                              |                                                                                                 |                            |       |                                                                                |
| 32 | Gill <sup>29</sup>         | Medical data from 1925-6 for health districts in Punjab; clinical confirmation               | 29 forecasts consisting of visual inspection of rainfall, spleen rates, and epidemic potential† | Seasonal epidemic (yes/no) |       | Qualitative comparison of prediction (presence of epidemic) to epidemic figure |
| 33 |                            |                                                                                              |                                                                                                 |                            |       |                                                                                |
| 34 |                            |                                                                                              |                                                                                                 |                            |       |                                                                                |
| 35 |                            |                                                                                              |                                                                                                 |                            |       |                                                                                |
| 36 |                            |                                                                                              |                                                                                                 |                            |       |                                                                                |
| 37 |                            |                                                                                              |                                                                                                 |                            |       |                                                                                |
| 38 |                            |                                                                                              |                                                                                                 |                            |       |                                                                                |
| 39 |                            |                                                                                              |                                                                                                 |                            |       |                                                                                |
| 40 |                            |                                                                                              |                                                                                                 |                            |       |                                                                                |
| 41 |                            |                                                                                              |                                                                                                 |                            |       |                                                                                |
| 42 |                            |                                                                                              |                                                                                                 |                            |       |                                                                                |
| 43 |                            |                                                                                              |                                                                                                 |                            |       |                                                                                |
| 44 |                            |                                                                                              |                                                                                                 |                            |       |                                                                                |
| 45 |                            |                                                                                              |                                                                                                 |                            |       |                                                                                |
| 46 |                            |                                                                                              |                                                                                                 |                            |       |                                                                                |
| 47 |                            |                                                                                              |                                                                                                 |                            |       |                                                                                |
| 48 |                            |                                                                                              |                                                                                                 |                            |       |                                                                                |
| 49 |                            |                                                                                              |                                                                                                 |                            |       |                                                                                |

1  
2  
3  
4  
5  
6  
7  
8  
9  
10  
11  
12  
13  
14  
15  
16  
17  
18  
19  
20  
21  
22  
23  
24  
25  
26  
27  
28  
29  
30  
31  
32  
33  
34  
35  
36  
37  
38  
39  
40  
41  
42  
43  
44  
45  
46  
47  
48  
49

|                             |                                                                                                          |                                                                                                              |                                    |                                                              |                                                         |
|-----------------------------|----------------------------------------------------------------------------------------------------------|--------------------------------------------------------------------------------------------------------------|------------------------------------|--------------------------------------------------------------|---------------------------------------------------------|
| Medina et al. <sup>30</sup> | Community health center data from 1996-2004 (14 centers) for Niono District, Mali; clinical confirmation | Multiplicative Holt-Winters model, age-specific rates (3 age groups); compared to seasonal adjustment method | Monthly malaria consultation rates | 36/72; 2 & 3 month ahead forecasts; one step ahead forecasts | mean absolute percentage error & 95% CI                 |
| Xu and Jin <sup>31</sup>    | Data from 2000-5 for Jiangsu Province, China                                                             | Grey model                                                                                                   | Yearly cases                       | 4/1                                                          | Visual (plot of predicted vs. observed number of cases) |

---

CI, confidence interval; ARIMA, auto-regressive integrated moving average; SARIMA, seasonal auto-regressive integrated moving average; ARIMAX, auto-regressive integrated moving average with exogenous input; VSEIRS: vector-susceptible-exposed-infected-recovered-susceptible model

\*Seasonal epidemic figure is the ratio of October incidence to mean spring incidence

†Epidemic potential is the coefficient of variability of fevers during the month of October for the periods of 1868-1921

districts. Almost all of the studies (97%) used health clinic records of malaria infections from the general population as their data source for malaria infections, with one study using cohort data. Eleven (38%) of the 29 studies used laboratory confirmation of malaria cases (microscopy and/or rapid diagnostic tests), seven (24%) used clinical confirmation, and two (7%) used a mixture of clinical and microscopic confirmation. Nine studies did not state whether they used clinical or microscopic confirmation of malaria.

### Forecasting studies

The forecasting approaches included statistical modelling, mathematical modelling, and machine learning methods. The statistical methods included generalized linear models, Auto-Regressive Integrated Moving Average (ARIMA) models,<sup>32</sup> and Holt-Winters models<sup>33</sup>. The mathematical models were based upon extensions of the Ross-MacDonald Susceptible-Infected-Recovered malaria transmission model.<sup>34</sup> Other authors predicted malaria incidence using neural networks, a machine learning technique.<sup>35</sup>

**Table 2**

| Forecasting method  | No. of studies (ref. no.)                                    |
|---------------------|--------------------------------------------------------------|
| GLM                 | 12 <sup>3, 4, 5, 6, 7, 8, 9, 11, 12, 10, <b>22, 23</b></sup> |
| ARIMA               | 7 <sup><b>13, 14</b>, 15, 16, 17, 18, 19, 20</sup>           |
| Grey methods        | 4 <sup>26, 27, 28, 31</sup>                                  |
| Smoothing methods*  | 3 <sup><b>13, 14, 30</b></sup>                               |
| Neural networks     | 3 <sup><b>23, 24, 25</b></sup>                               |
| Mathematical models | 2 <sup>21, <b>22</b></sup>                                   |
| Visual              | 1 <sup>29</sup>                                              |

Bolded reference indicates multiple comparisons

\*Includes Holt Winters, seasonal average, seasonally adjusted average, and simple average

1  
2  
3 Twelve studies (41%) included in the review used generalized linear models to  
4 forecast malaria counts, rates, or proportions through linear, Poisson, or logistic  
5 regression. All but one of the regression models included climate related covariates such  
6 as rainfall, temperature, vegetation, and/or relative humidity.<sup>12</sup> Typically, the weather  
7 covariates were lagged, to account for the delayed effects of weather on malaria  
8 infections. Two studies<sup>4, 8</sup> explored the effects of including covariates as higher order  
9 polynomials. Several of the studies used a generalized linear model approach to time  
10 series analysis by including previous (lagged) malaria incidence as an autoregressive  
11 covariate in the model. Some models included terms for season or year to account for  
12 seasonal and annual variations.  
13  
14  
15  
16  
17  
18  
19  
20  
21  
22  
23  
24  
25

26  
27 Seven studies (24%) used forecasting approaches based on ARIMA modelling  
28 varied, with some including a seasonal component (SARIMA). While not explicitly  
29 stated, many studies used a transfer function model, also known as ARIMAX. Typically,  
30 these ARIMA based models incorporated various meteorological series as covariates  
31 although one study also included data on the malaria burden in neighboring districts.<sup>14</sup>  
32  
33  
34  
35  
36  
37  
38

39 Four studies (14%) from China used the Grey method for malaria forecasting,  
40 none of which incorporated predictors other than malaria incidence.<sup>26-28, 31</sup> There were  
41 two studies (7%) that used mathematical models.<sup>21, 22</sup> Gaudart et al.<sup>21</sup> included a vector  
42 component in a susceptible-infected-recovered (SIR) type model and used data from a  
43 cohort of children, remote sensing data, literature, and expert opinions of entomologists  
44 and parasitologists. The study by Laneri et al.<sup>22</sup> used a vector-susceptible-exposed-  
45 infected-recovered-susceptible (VSEIRS) model although they incorporated two different  
46 pathways from recovery to susceptibility that were based upon different time scales  
47 (seasonal and inter-annual), mimicking different transmission intensities. They found that  
48  
49  
50  
51  
52  
53  
54  
55  
56  
57  
58  
59  
60

1  
2  
3 rainfall had a significant effect on the inter-annual variability of epidemic malaria and  
4 including rainfall as a predictor improved forecast accuracy. The parameters in their  
5  
6 models were selected based upon the literature as well as laboratory findings.  
7  
8  
9

10 We identified three studies (10%) that used neural networks in their analyses, and  
11 each study used different input data and a unique network structure.<sup>23-25</sup> Two of the  
12 studies used weather variables to predict malaria incidence.<sup>24, 25</sup> Gao et al.<sup>24</sup> also included  
13 evaporation and sunshine hours to predict malaria incidence, two variables that were not  
14 included in any other study.  
15  
16  
17  
18  
19  
20  
21

22 As shown in table 3, climate-related predictors were used consistently in  
23 forecasting models, with the most common predictors being rainfall, relative humidity,  
24 temperature, and normalized difference vegetation index. One study accounted for the  
25 effect of malaria incidence in neighboring districts, but it was not a significant predictor  
26 and was excluded from the final model.<sup>14</sup> The mathematical models included non-time  
27 varying parameters such as the reporting fraction of cases (proportion of malaria cases in  
28 a population that is reported to public health), average life expectancy, and several vector  
29 characteristics, which are listed in table 4.  
30  
31  
32  
33  
34  
35  
36  
37  
38  
39  
40  
41  
42  
43  
44  
45  
46  
47  
48  
49  
50  
51  
52  
53  
54  
55  
56  
57  
58  
59  
60



**Table 3. Time varying predictors considered in malaria forecasting models**

| Predictor                             | No. of studies (ref. no.)                    |
|---------------------------------------|----------------------------------------------|
| <b>Rainfall</b>                       |                                              |
| Total rainfall                        | 11 <sup>3-6, 9, 10, 14, 16, 18, 22, 25</sup> |
| Average rainfall                      | 2 <sup>8, 24</sup>                           |
| Rainy day index*                      | 1 <sup>14</sup>                              |
| Number of rainy days/month            | 1 <sup>24</sup>                              |
| <b>Humidity</b>                       |                                              |
| Average relative humidity             | 7 <sup>6, 8, 10, 16, 18, 24, 25</sup>        |
| Minimum humidity                      | 1 <sup>4</sup>                               |
| Maximum humidity                      | 1 <sup>4</sup>                               |
| <b>Temperature</b>                    |                                              |
| Maximum air temperature               | 8 <sup>4-6, 9, 10, 16, 18, 24</sup>          |
| Minimum air temperature               | 7 <sup>4, 5, 9, 10, 16, 18, 24</sup>         |
| Average air temperature               | 4 <sup>8, 10, 24, 25</sup>                   |
| Average LST                           | 2 <sup>3, 25</sup>                           |
| Temperature condition index           | 1 <sup>7</sup>                               |
| <b>Vegetation</b>                     |                                              |
| Average NDVI                          | 2 <sup>3, 5</sup>                            |
| Maximum NDVI                          | 2 <sup>21, 25</sup>                          |
| Vegetation condition index            | 1 <sup>7</sup>                               |
| <b>Other environmental predictors</b> |                                              |
| Average air pressure                  | 2 <sup>18, 24</sup>                          |
| Average air evaporation               | 1 <sup>24</sup>                              |
| Sunshine hours                        | 1 <sup>24</sup>                              |
| <b>Other</b>                          |                                              |
| Malaria in neighboring districts      | 1 <sup>14</sup>                              |
| Population                            | 1 <sup>4</sup>                               |

LST, land surface temperature; NDVI, normalized difference vegetation index

\*Rainy day index: dividing the number of days per month when rainfall was larger than zero by the number of days that a reading for rainfall was available

**Table 4. Parameters included in the mathematical forecasting models**

| Predictor                                                                                    | Reference no. |
|----------------------------------------------------------------------------------------------|---------------|
| Vector                                                                                       |               |
| Mean developmental delay                                                                     | 22            |
| Number of bites per night                                                                    | 21            |
| Probability of a susceptible becoming infected after one single bite from a contagious human | 21            |
| Mortality per day                                                                            | 21            |
| Density                                                                                      | 21            |
| Length of gonotrophic cycle                                                                  | 21            |
| Time lag of NDVI influence                                                                   | 21            |
| Lowest NDVI value to influence behaviour                                                     |               |
| Humans                                                                                       |               |
| Probability of a susceptible human becoming infected after one single infected bite          | 21            |
| Probability of becoming susceptible after being resistant                                    | 21, 22        |
| Probability of acquiring contagiousness                                                      | 21, 22        |
| Probability of losing contagiousness                                                         | 21, 22        |
| Average human life expectancy                                                                | 22            |
| Infectivity of quiescent cases relative to full-blown infections                             | 22            |
| Other                                                                                        |               |
| Reporting fraction*                                                                          | 22            |

NDVI, normalized difference vegetation index

\*Reporting fraction is the fraction of malaria cases in the population that are reported to public health

## Evaluation methods

Authors used different approaches to evaluate the accuracy of forecasting models. A typical approach was to segment the data into a model building or training portion with the other portion (the 'holdout' sample) used for model validation or assessing forecast accuracy. The cross-validation approach used by Rahman et al.<sup>7</sup> and Teklehaimanot et al.<sup>9</sup> excluded one year of data at a time, fit the model to the remaining data, computed forecast error (prediction residual) using data from the missing year, and then repeated the process for the subsequent years. The accuracy of the predictions was then estimated from the prediction residuals. Some of the studies used all the available data to fit a model and did not reserve data for assessing forecast accuracy.<sup>21, 22</sup>

Studies compared the forecasts to observed values using various measures: mean squared error, mean relative error, mean percentage error, correlation coefficients, paired t-tests (between predicted and observed values), 95% confidence intervals (of predicted values and determined if observed values fell within the interval), and visualizations (e.g. graphical representations of observed and predicted values).

## Comparison of forecasting methods

We could not compare the forecast accuracy of models from different studies due to the lack of common measures and the lack of scale independent measures. However, we briefly discuss the findings from studies that compared different methods within a single study.

Abeku et al.<sup>13</sup> found that their ARIMA models provided the least accurate forecasts when compared with variations of seasonal averages, and the most accurate forecasts were produced by the seasonal average that incorporated deviations from the last three observations (SA<sub>3</sub>). In contrast, Briet et al.<sup>14</sup> found that the most accurate model

1  
2  
3 varied by district and forecasting horizon, but the SARIMA approach tended to provide  
4 the most accurate forecasts, followed by an ARIMA model with seasonality modelled  
5 using a sine term, then Holt-Winters, with the SA<sub>3</sub> providing the least accurate forecasts.  
6  
7 They also considered independent time series, such as rainfall and malaria cases in  
8 neighboring districts, in the models. Medina et al.<sup>30</sup> determined that their Holt-Winters  
9 method provided more accurate forecasts and the accuracy did not deteriorate as rapidly  
10 as with the SA<sub>3</sub> method. Cunha et al.<sup>23</sup> found that their neural network provided more  
11 accurate predictions across all three forecast horizons (3, 6, and 12 months) when  
12 compared to a logistic regression model.  
13  
14  
15  
16  
17  
18  
19  
20  
21  
22  
23

## 24 DISCUSSION

25  
26 Malaria forecasting can be an invaluable tool for malaria control and elimination  
27 efforts. A public health practitioner developed a simple forecasting method, which led to  
28 the first early warning system of malaria.<sup>1</sup> Forecasting methods for malaria have  
29 advanced since that early work, but the utility of more sophisticated models for clinical  
30 and public health decision-making is not always evident. The accuracy of forecasts is a  
31 critical factor in determining the practical value of a forecasting system. The variability in  
32 methods is a strength of malaria forecasting, as it allows for tailored approaches to  
33 specific settings and contexts. There should also be continued effort to develop new  
34 methods although common forecasting accuracy measures are essential as they will help  
35 determine the optimal approach with existing and future methods.  
36  
37  
38  
39  
40  
41  
42  
43  
44  
45  
46  
47  
48  
49

50 When performing forecasting, it is important to understand the assumptions of  
51 forecast models and understand the advantages and disadvantages of each. Forecast  
52 accuracy should always be measured on reserved data and common forecasting measures  
53 should be used to facilitate comparison between studies. One should explore non-climate  
54  
55  
56  
57  
58  
59  
60

1  
2  
3 predictors, including transmission reducing interventions, as well as different forecasting  
4  
5 approaches based upon the same data.  
6  
7

### 8 **Differences between forecasting methods**

9

10 The regression approach to time series prediction attempts to model the serial  
11 autocorrelation in the data through the inclusion of autoregressive terms and/or sine and  
12 cosine functions for seasonality. Generalized linear regression models are used  
13 commonly and their main advantages are their flexibility and the intuitive nature of this  
14 approach for many people relative to ARIMA models. For example, the temporal  
15 dynamics observed in time series plots can be feasibly managed in generalized linear  
16 models by including several cyclic factors, interaction terms, and numerous predictors.<sup>36</sup>  
17  
18 The main disadvantages are that generalized linear models do not naturally account for  
19 correlation in the errors<sup>37</sup> and the models may need to be complex to capture all the  
20 dynamics of the relationship within a series and between two or more series.<sup>38</sup> Failure to  
21 accurately model serial autocorrelation may bias the estimation of the effect of malaria-  
22 related variables as well as underestimate the standard errors. Crucially, the regression  
23 models residuals must be examined for autocorrelation and it was not always evident that  
24 this occurred in the studies we identified that used this method. Additionally, it was not  
25 apparent if any remedial measures were used to account for the effect of autocorrelation  
26 on estimates of variance, e.g. re-estimating standard errors using heteroskedasticity and  
27 autocorrelation consistent (HAC) estimators.<sup>39</sup>  
28  
29  
30  
31  
32  
33  
34  
35  
36  
37  
38  
39  
40  
41  
42  
43  
44  
45  
46  
47  
48  
49

50 ARIMA models are designed to account for serial autocorrelation in time series;  
51 current values of a series can be explained as a function of past values and past shocks.<sup>38</sup>  
52  
53 With ARIMA models, once the series have been detrended through differencing, any  
54 remaining seasonality can be modelled as part of additional autoregressive or moving  
55  
56  
57  
58  
59  
60

1  
2  
3 average parameters of a SARIMA model. A rule of thumb is that 50 observations are a  
4  
5 minimal requirement for ARIMA models,<sup>37</sup> whereas SARIMA models require longer  
6  
7 time series. The transfer function model, ARIMAX, extends ARIMA by also including as  
8  
9 predictors current and/or past values of an independent variable. An advantage of  
10  
11 ARIMA models versus GLMs is that ARIMA models naturally represent features of  
12  
13 temporal patterns, such as seasonality and autocorrelation. As with generalized linear  
14  
15 regression models, the residuals of ARIMA models need to be examined for residual  
16  
17 correlation. Also, when incorporating an input series into the model, pre-whitening  
18  
19 should occur prior to the cross-correlation assessment for the transfer function models.  
20  
21 Pre-whitening is when the residuals from an ARIMA model for the input series are  
22  
23 reduced to 'white noise' and the same ARIMA model is applied to the output series.<sup>37</sup>  
24  
25 Authors did not always report that they pre-whitened the series prior to assessing cross-  
26  
27 correlations. The relationship between the two resulting residual series is then estimated  
28  
29 by the cross-correlation function. Without pre-whitening, the estimated cross-correlation  
30  
31 function may be distorted and misleading.  
32  
33  
34  
35  
36  
37  
38

39 Four studies from China used the Grey method for malaria forecasting.<sup>26-28, 31</sup> This  
40  
41 forecasting method is essentially a curve fitting technique based on a smoothed version of  
42  
43 the observed data.<sup>40, 41</sup> The Grey model appears most useful in predicting malaria when  
44  
45 using a very short time series and when there is a strong linear trend in the data. This is  
46  
47 due to the nature of the GM(1,1) model which will always generate either exponentially  
48  
49 increasing or decreasing series.<sup>42</sup> Its value in malaria prediction beyond that of the  
50  
51 simpler statistical modelling approaches is yet to be determined.  
52  
53  
54

55 The approach to prediction differs between mathematical models and other  
56  
57 approaches such as generalized linear models, ARIMA and Grey models. The Ross-  
58  
59  
60

1  
2  
3 Macdonald mathematical model divides the population under study into different  
4 compartments such as susceptible, infected, and recovered, and uses differential  
5 equations to model the transition over time of individuals from one group to another. By  
6 using differential equations, these models can represent explicitly the dynamics of  
7 malaria infection, mosquito populations and human susceptibility. The disadvantages of  
8 mathematical models include the difficulty in finding appropriate, setting-specific data  
9 for the parameters. Also, the computational complexity of these models increases with  
10 the number of parameters, resulting in the omission of relevant features of malaria  
11 dynamics in order for the model to be manageable.<sup>43</sup>

12  
13  
14  
15  
16  
17  
18  
19  
20  
21  
22  
23  
24  
25 A neural network is a machine learning method that connects a set of inputs (e.g.  
26 weather covariates) to outputs (e.g. malaria counts).<sup>44</sup> The connection between inputs and  
27 outputs are made via 'neurons' and the number of links and corresponding weights are  
28 chosen to give the best possible fit to the training data. Neural networks have been proven  
29 to be useful in their capacity to handle non-linear relationships as well as a large number  
30 of parameters, and also their ability to detect all possible interactions between predictor  
31 variables.<sup>45</sup> Mathematical models and neural networks are able to capture thresholds or  
32 limits on malaria transmission, which cannot be readily captured by statistical  
33 approaches. For example, in generalized linear models, a small decrease in the  
34 temperature leads to a small decrease in malaria incidence. Neural networks and  
35 mathematical models can represent explicitly that there will be no malaria transmission  
36 below a certain temperature. The disadvantages of neural networks include difficulties in  
37 determining how the network is making its decision and its greater computational  
38 burden;<sup>46</sup> both of which depend upon the number of input parameters included in the  
39 model. Additionally, neural networks have a greater susceptibility to overfitting<sup>45</sup> and  
40  
41  
42  
43  
44  
45  
46  
47  
48  
49  
50  
51  
52  
53  
54  
55  
56  
57  
58  
59  
60

1  
2  
3 several thousand observations are typically required to fit a neural network with  
4  
5 confidence.<sup>46</sup> Malaria time series are unlikely to contain several thousands of  
6  
7  
8 observations, perhaps unless the observations are aggregated over time (e.g., monthly)  
9  
10 and location (e.g., national level).  
11

12  
13 Researchers have examined many forecasting methods, but published articles tend  
14  
15 to describe the application of a single method to a unique dataset. Direct comparison of  
16  
17 methods would be easier if multiple malaria forecasting methods were applied to the  
18  
19 same data. This approach would allow identification of the methods that provide the most  
20  
21 accurate short-term, intermediate, and long-term forecasts, for a given setting and a set of  
22  
23 predictors. It would also allow exploration of gains in forecast accuracy by using a  
24  
25 weighted combination of forecasts from several models and/or methods.<sup>47</sup>  
26  
27  
28

### 29 **Malaria predictors**

30  
31 It has been suggested that climate and meteorological predictors have greater  
32  
33 predictive power when modelling malaria incidence in areas with unstable transmission  
34  
35 as compared to areas with stable endemicity.<sup>48</sup> It is interesting to note that nearly all of  
36  
37 the models focused narrowly on a small number of environmental predictors despite the  
38  
39 importance of other predictors of malaria incidence, such as land use, bednets, indoor  
40  
41 residual spraying, and antimalarial resistance. Forecast accuracy may be weakened if  
42  
43 transmission reducing interventions are not considered in the models.  
44  
45  
46  
47

### 48 **Forecast evaluation**

49  
50 Model selection based upon model fitting criteria such as Akaike's information  
51  
52 criterion, Bayesian information criterion, or the coefficient of determination, are standard  
53  
54 measures considered when choosing a regression model. Using such measures to guide  
55  
56 forecast model selection may result in selecting models with a greater number of  
57  
58  
59  
60



1  
2  
3 parameters and “over-fitting”, which tends to result in inaccurate forecasts.<sup>49</sup> For the  
4  
5 purposes of forecasting, visualizations of forecasts compared to observations and forecast  
6  
7 accuracy measures, such as the mean absolute forecast error, provide more direct and  
8  
9 intuitive model selection criteria.  
10  
11

12  
13 When choosing how much of the series to reserve for testing the model, it is  
14  
15 recommended to reserve at least as much as the maximum forecast horizon.<sup>50</sup> Cross-  
16  
17 validation is a more efficient use of data than partitioning a data set into train and test  
18  
19 segment, although it is more computational intensive. It is recommended in cross-  
20  
21 validation that only prior observations be used for testing a future value.<sup>50</sup>  
22  
23

24  
25 Various direct measures were used to estimate forecasting error. Absolute  
26  
27 measures, such as the mean absolute error (MAE), are relevant for measuring accuracy  
28  
29 within a particular series but not across series because the magnitude of the mean  
30  
31 absolute error depends on the scale of the data.<sup>51</sup> Percent errors, such as mean absolute  
32  
33 percent error (MAPE) are scale-independent but are not recommended when the data  
34  
35 involves 0 counts as MAPE cannot be calculated with 0 values. Also, the MAPE places a  
36  
37 heavier penalty on on forecasts that exceed the observed compared to those that are less  
38  
39 than the observed.<sup>52</sup> In economics, a measure called mean absolute scaled error (MASE)  
40  
41 has been recommended as a accuracy measure for forecasting.<sup>51</sup> We recommend  
42  
43 incorporating MASE into malaria forecast evaluation as this evaluation measure will  
44  
45 facilitate comparison between studies. We also recommend reporting MAE as it allows  
46  
47 an intuitive interpretation of the errors. Additionally, MAPE should be reported and a  
48  
49 constant such as 1, could replace the 0 values in the series, allowing the calculation of  
50  
51 MAPE. An advantage of MAPE as that it considers scale variance. For example, if we  
52  
53 observed 70 counts of malaria but predicted 60, MAPE would be 14.3, MAE 10, and  
54  
55  
56  
57  
58  
59  
60

1  
2  
3 MASE 0.7. If we observed 15 counts of malaria but predicted 5, MAPE would be 66.7,  
4  
5 MAE 10, and MASE 0.7. MAPE and MASE could be used to compare findings across  
6  
7 series and studies, and also compared to one another to understand if and how they differ  
8  
9 in their ranking of forecast accuracy. The MAE, MAPE, and MASE should be provided  
10  
11 as site-specific measures for each forecasting horizon, as summary measures for each  
12  
13 site, and finally as summary measures for each forecasting horizon across all sites (within  
14  
15 a study).  
16  
17  
18  
19

## 20 **Conclusion**

21  
22 Accurate disease predictions and early warning signals of increased disease  
23  
24 burden can provide public health and clinical health services with the information  
25  
26 needed to strategically implement prevention and control measures. Potential barriers to  
27  
28 their usefulness in public health settings include the spatial and temporal resolution of  
29  
30 models and accuracy of prediction. Models that produce coarse forecasts may not  
31  
32 provide the precision necessary to guide targeted intervention efforts. Additionally,  
33  
34 technical skill and lack of readily available data may reduce the feasibility of model  
35  
36 utility in practice, which should be considered in developing malaria forecasting  
37  
38 models if the intent is to use these models in clinical or public health settings. Applying  
39  
40 different forecasting methods to the same data, exploring the predictive ability of non-  
41  
42 environmental variables, including transmission reducing interventions, and using  
43  
44 common forecast accuracy measures will allow malaria researchers to compare and  
45  
46 improve models and methods, and lead to the improvement in the quality of malaria  
47  
48 forecasting.  
49  
50  
51  
52  
53  
54  
55  
56  
57  
58  
59  
60

### **Acknowledgements**

We would like to thank various authors for responding to our questions and also to gratefully acknowledge Lorie Kloda for her assistance in our literature search strategies. We would especially like to thank the reviewers for critically reading the manuscript and providing insightful suggestions.

### **Competing interests**

None declared.

### **Funding**

This work was supported by the Canadian Institutes of Health Research Interdisciplinary Capacity Enhanced Team grant number HOA-80072.

### **Contributorship**

Kate Zinszer, Aman Verma, Katia Charland, Timothy Brewer, and David Buckeridge contributed to the study concept and design. Kate Zinszer, Aman Verma, and Zhuoyu Sun contributed to the article review and data abstraction. Kate Zinszer, Aman Verma, Katia Charland, Timothy Brewer, John Brownstein and David Buckeridge contributed to the interpretation of the data, and drafted the manuscript. All authors critically revised the manuscript for important intellectual content and approved final version submitted for publication

### **Data Sharing**

There is no additional data.

## References

1. Christophers SR. Epidemic malaria of the Punjab: with a note of a method of predicting epidemic years. *Transactions of the Committee for the Study of Malaria in India* 1911;2:17-26.
2. Levac D, Colquhoun H, O'Brien KK. Scoping studies: advancing the methodology. *Implement Sci* 2010;5:69.
3. Adimi F, Soebiyanto RP, Safi N, *et al.* Towards malaria risk prediction in Afghanistan using remote sensing. *Malar J* 2010;9:125. doi:10.1186/1475-2875-9-1259
4. Chatterjee C, Sarkar RR. Multi-step polynomial regression method to model and forecast malaria incidence. *PLoS ONE* 2009;4:e4726. doi:10.1371/journal.pone.0004726
5. Gomez-Elipse A, Otero A, van Herp M, *et al.* Forecasting malaria incidence based on monthly case reports and environmental factors in Karuzi, Burundi, 1997-2003. *Malar J* 2007;6:129. doi:10.1186/1475-2875-6-129
6. Haghdoost AA, Alexander N, Cox J. Modelling of malaria temporal variations in Iran. *Trop Med Int Health* 2008;13:1501-8.
7. Rahman A, Kogan F, Roytman L, *et al.* Modelling and prediction of malaria vector distribution in Bangladesh from remote-sensing data. *Int J Remote Sens* 2011;32:1233-51.
8. Roy SB, Sarkar RR, Somdatta S. Theoretical investigation of malaria prevalence in two Indian cities using the response surface method. *Malar J* 2011;10:301. doi:10.1186/1475-2875-10-301
9. Teklehaimanot HD, Schwartz J, Teklehaimanot A, *et al.* Weather-based prediction of Plasmodium falciparum malaria in epidemic-prone regions of Ethiopia II. *Malar J* 2004;3:44. doi:10.1186/1475-2875-3-44

- 1  
2  
3 10. Xiao D, Long Y, Wang S, *et al.* Spatiotemporal distribution of malaria and the  
4 association between its epidemic and climate factors in Hainan, China. *Malar J*  
5  
6 2010;9:185. doi:10.1186/1475-2875-9-185  
7  
8  
9  
10 11. Yacob M, Swaroop S. Preliminary forecasts of the incidence of malaria in the Punjab.  
11  
12 *Indian Journal of Malariology* 1947;1:491-501.  
13  
14 12. Yan W, Jiang S, Li J, *et al.* Establishment of a dynamic model of malaria outbreak in  
15 Chongqing municipality. *Journal of Tropical Medicine [Guangzhou]* 2007;7:801-3.  
16  
17 13. Abeku TA, De Vlas SJ, Borsboom G, *et al.* Forecasting malaria incidence from  
18 historical morbidity patterns in epidemic-prone areas of Ethiopia: A simple seasonal  
19 adjustment method performs best. *Trop Med Int Health* 2002;7:851-7.  
20  
21 14. Briët OJ, Vounatsou P, Gunawardena DM, *et al.* Models for short term malaria  
22 prediction in Sri Lanka. *Malar J* 2008;7:76. doi:10.1186/1475-2875-7-76  
23  
24 15. Liu J, Qu B, He Q. Epidemiological analysis on malaria incidence in China from  
25 2004 to 2009 by time series model. *Chinese Journal of Vector Biology and Control*  
26 2011;22:134-6.  
27  
28 16. Wangdi K, Singhasivanon P, Silawan T, Lawpoolsri S, White NJ, Kaewkungwal J.  
29 Development of temporal modelling for forecasting and prediction of malaria infections  
30 using time-series and ARIMAX analyses: a case study in endemic districts of Bhutan.  
31  
32 *Malar J* 2010;9:251. doi:10.1186/1475-2875-9-251  
33  
34  
35  
36  
37  
38 17. Wen L, Xu D, Lin M, *et al.* Prediction of malaria incidence in malaria epidemic area  
39 with time series model. *Journal of the Fourth Military Medical University* 2004;25:507-  
40  
41 10.  
42  
43  
44  
45  
46  
47  
48 18. Zhang Y, Bi P, Hiller JE. Meteorological variables and malaria in a Chinese  
49 temperate city: a twenty-year time-series data analysis. *Environ Int* 2010;36:439-45.  
50  
51  
52  
53  
54  
55  
56  
57  
58  
59  
60

- 1  
2  
3  
4  
5  
6  
7  
8  
9  
10  
11  
12  
13  
14  
15  
16  
17  
18  
19  
20  
21  
22  
23  
24  
25  
26  
27  
28  
29  
30  
31  
32  
33  
34  
35  
36  
37  
38  
39  
40  
41  
42  
43  
44  
45  
46  
47  
48  
49  
50  
51  
52  
53  
54  
55  
56  
57  
58  
59  
60
19. Zhou S, Huang F, Shen Y. Application of ARIMA model on prediction of malaria incidence. *Journal of Pathogen Biology* 2007;2:284-6.
20. Zhu JM, Tang LH, Zhou SS, *et al.* Study on the feasibility for ARIMA model application to predict malaria incidence in an unstable malaria area. *Chinese Journal of Parasitology and Parasitic Diseases* 2007;25:232-6.
21. Gaudart J, Toure O, Dessay N, *et al.* Modelling malaria incidence with environmental dependency in a locality of Sudanese savannah area, Mali. *Malar J* 2009;8:61.  
doi:10.1186/1475-2875-8-61
22. Laneri K, Bhadra A, Ionides EL, *et al.* Forcing versus feedback: epidemic malaria and monsoon rains in northwest India. *PLoS Comput Biol* 2010;6.  
doi:10.1371/journal.pcbi.1000898
23. Cunha GB, Luitgards-Moura JF, Naves ELM, *et al.* Use of an artificial neural network to predict the incidence of malaria in the city of Canta, state of Roraima. *Revista da Sociedade Brasileira de Medicina Tropical* 2010;43:567-70.
24. Gao CY, Xiong HY, Yi D, *et al.* Study on meteorological factors-based neural network model of malaria. *Chinese Journal of Epidemiology* 2003;24:831-4.
25. Kiang R, Adimi F, Soika V, *et al.* Meteorological, environmental remote sensing and neural network analysis of the epidemiology of malaria transmission in Thailand. *Geospat Health* 2006;1:71-84.
26. Fang Y, Deng D, Gu ZC, *et al.* Interval division, forecasting and decline tendency estimation model of malaria incidence in Xuzhou City. *Chinese Journal of Parasitology and Parasitic Diseases* 1991;9:284-6.

- 1  
2  
3 27. Gao S, Liu J, Zhang R, *et al.* Establishment and estimation of a GM (1,1) grey model  
4 for forecasting of malaria epidemic situation in Shenzhen Longgang areas. *Journal of*  
5  
6 *Pathogen Biology* 2007;2:357-9.  
7  
8  
9  
10 28. Guo H, Ding H, Qu B, *et al.* A study on the trend of malaria incidence in China in the  
11 recent 20 years with GM (1,1). *Journal of Tropical Medicine [Guangzhou]* 2011;11:639-  
12  
13 40.  
14  
15  
16  
17 29. Gill CA. The forecasting of malaria epidemics with special reference to the malaria  
18 forecast for the year 1926. *Indian Journal of Medical Research* 1927;15:265-76.  
19  
20  
21  
22 30. Medina DC, Findley SE, Guindo B, *et al.* Forecasting non-stationary diarrhea, acute  
23 respiratory infection, and malaria time-series in Niono, Mali. *PLoS ONE* 2007;2.  
24  
25  
26  
27 doi:10.1371/journal.pone.0001181  
28  
29 31. Xu X, Jin X. The application of GM (1,1) grey model in the forecasting of malaria  
30 epidemic situation. *Chinese Journal of Parasitic Disease Control* 2005;18:178-9.  
31  
32  
33  
34 32. Box GEP, Jenkins GM, Reinsel GC. *Time series analysis: forecasting and control.*  
35  
36 Hoboken, NJ: John Wiley & Sons, 2008.  
37  
38  
39 33. Chatfield C. The Holt-Winters forecasting procedure. *Journal of the Royal Statistical*  
40  
41 *Society* 1978;27:264-79.  
42  
43  
44 34. MacDonald G. *The epidemiology and control of malaria.* London: Oxford University  
45 Press, 1957..  
46  
47  
48 35. Anderson JA. *An introduction to neural networks.* Cambridge, MA: The MIT Press,  
49  
50 1995.  
51  
52  
53 36. Darlington RB. *A comparison to ARIMA.*  
54  
55  
56 <http://www.psych.cornell.edu/darlington/series/series2.htm> (accessed 30 May 2012).  
57  
58  
59  
60

- 1  
2  
3 37. Chatfield C. *The analysis of time series: an introduction*. London: Chapman & Hall,  
4  
5 2004.  
6  
7  
8 38. Shumway RH, Stoffer DS. *Time series analysis and its applications: with R*  
9  
10 *examples*. New York: Springer, 2006.  
11  
12 39. Zeileis A. Econometric computing with HC and HAC covariance matrix estimators.  
13 *Journal of Statistical Software* 2004;11:1-17.  
14  
15 40. Deng JL. Introduction to Grey system theory. *Journal of Grey System* 1989;1:1-24.  
16  
17 41. Lin KH, Liu BD. A gray system modelling approach to the prediction of calibration  
18 intervals. *IEEE Transactions of Instrumentation and Measurement* 2005;54:297-305.  
19  
20 42. Tseng FM, Yu HC, Tzeng GH. Applied hybrid grey model to forecast seasonal time  
21 series. *Technological Forecasting and Social Change* 2001;67:291-302.  
22  
23 43. Koella JC. On the use of mathematical models of malaria transmission. *Acta Trop*  
24 1991;49:1-25.  
25  
26 44. Chatfield C. Neural networks: forecasting breakthrough or passing fad? *International*  
27 *Journal of Forecasting* 1993;9:1-3.  
28  
29 45. Tu JV. Advantages and disadvantages of using artificial neural networks versus  
30 logistic regression for predicting medical outcomes. *J Clin Epidemiol* 1996;49:1225-31.  
31  
32 46. Chatfield C. Forecasting in the 1990s. *Journal of the Royal Statistical Society*  
33 1997;46:461-73.  
34  
35 47. Jose VRR, Winkler RL. Simple robust averages of forecasts: Some empirical results.  
36 *International Journal of Forecasting* 2008;24:163-9.  
37  
38 48. Hay SI, Rogers DJ, Shanks GD, *et al*. Malaria early warning in Kenya. *Trends*  
39 *Parasitol* 2001;17:95-9.  
40  
41 49. Shmueli G. To Explain or to predict? *Statistical Science* 2010;25:289-310.  
42  
43  
44  
45  
46  
47  
48  
49  
50  
51  
52  
53  
54  
55  
56  
57  
58  
59  
60



1  
2  
3 50. Hyndman RJ, Athanasopoulos G. *Forecasting: principles and practice*. 2012.

4  
5  
6 <http://otexts.com/fpp/> (accessed 3 May 2012).

7  
8 51. Hyndman RJ, Koehler AB. Another look at measures of forecast accuracy.

9  
10  
11 *International Journal of Forecasting* 2006;22:679-88.

12  
13 52. Armstrong JS, Collopy F. Error measures for generalizing about forecasting methods

14  
15 - empirical comparisons. *International Journal of Forecasting* 1992;8:69-80.  
16  
17  
18  
19  
20  
21  
22  
23  
24  
25  
26  
27  
28  
29  
30  
31  
32  
33  
34  
35  
36  
37  
38  
39  
40  
41  
42  
43  
44  
45  
46  
47  
48  
49  
50  
51  
52  
53  
54  
55  
56  
57  
58  
59  
60



Figure 1. Flow of literature searches and screening process

152x137mm (300 x 300 DPI)

only

**Title:** A scoping review of malaria forecasting: Past work and future directions

**Authors:** Kate Zinszer<sup>1,2</sup>, Aman D. Verma<sup>1,2</sup>, Katia Charland<sup>1,2,3,4</sup>, Timothy F. Brewer<sup>1,5</sup>, John S. Brownstein<sup>1,3,4,5</sup>, Zhuoyu Sun<sup>1</sup>, David L. Buckeridge<sup>1,2,6</sup>

**Addresses & Affiliations:**

<sup>1</sup>Department of Epidemiology, Biostatistics & Occupational Health, McGill University, Montreal, Canada

<sup>2</sup>Surveillance Lab, Clinical and Health Informatics Research Group, McGill University, Montreal, Canada

<sup>3</sup>Children's Hospital Informatics Program at the Harvard-MIT Division of Health Sciences and Technology, Harvard University, Boston, USA

<sup>4</sup>Division of Emergency Medicine, Children's Hospital Boston, Boston, USA

<sup>5</sup>Faculty of Medicine, McGill University, Montreal, Canada

<sup>6</sup>Agence de la Santé et des services Sociaux de Montréal, Direction de santé publique, 3725 Saint-Denis Street, Montréal, Québec, Canada H2L 1M3

**Corresponding author:** Kate Zinszer; Surveillance Lab, Clinical and Health Informatics Research Group, McGill University, 1040 Pine Avenue West, Montreal, Quebec, Canada H3A 1A3 kate.zinszer@mail.mcgill.ca, phone: 514-934-1934 x 32983, fax: 514-843-1551

**Key words:** malaria, epidemiology, forecasting, methods, review

**Word count:** 3,907

## ABSTRACT

**Objectives:** There is a growing body of literature on malaria forecasting methods and the objective of our review is to identify and assess methods, including predictors, used to forecast malaria.

**Design:** Scoping review. Two independent reviewers searched information sources, assessed studies for inclusion and extracted data from each study.

**Information sources:** Search strategies were developed and the following databases were searched: CAB Abstracts, EMBASE, Global Health, MEDLINE, ProQuest Dissertations & Theses, and Web of Science. Key journals and websites were also manually searched.

**Eligibility criteria for included studies:** We included studies that forecasted incidence, prevalence, or epidemics of malaria over time. A description of the forecasting model and an assessment of the forecast accuracy of the model were requirements for inclusion.

Studies were restricted to human populations and to autochthonous transmission settings.

**Results:** We identified 29 different studies that met our inclusion criteria for this review. The forecasting approaches included statistical modelling, mathematical modelling, and machine learning methods. Climate-related predictors were used consistently in forecasting models, with the most common predictors being rainfall, relative humidity, temperature, and the normalized difference vegetation index. Model evaluation was typically based upon a reserved portion of data and accuracy was measured in a variety of ways including mean squared error and correlation coefficients. We could not compare the forecast accuracy of models from the different studies as the evaluation measures differed across the studies.

1  
2  
3 **Conclusions:** Applying different forecasting methods to the same data, exploring the  
4 predictive ability of non-environmental variables, including transmission reducing  
5 interventions, and using common forecast accuracy measures will allow malaria  
6 researchers to compare and improve models and methods, which should improve the  
7 quality of malaria forecasting.  
8  
9

## 10 **ARTICLE SUMMARY**

### 11 **Article focus**

- 12 • Accurate predictions of malaria can provide public health and clinical health services  
13 with the information needed to strategically implement prevention and control  
14 measures.  
15
- 16 • The diversity in forecasting accuracy measures and the use of scale-dependent  
17 measures limits the comparability of forecasting results, making it difficult to identify  
18 the optimal predictors and methods for malaria forecasting.  
19
- 20 • The objective was to identify and assess methods, including predictors, used to  
21 forecast malaria.  
22  
23  
24  
25  
26  
27  
28  
29  
30  
31  
32  
33  
34  
35  
36  
37  
38

### 39 **Key messages**

- 40 • When performing forecasting, it is important to understand the assumptions of  
41 each method as well as the associated advantages and disadvantages.  
42
- 43 • Common accuracy measures are essential as they will facilitate the comparison of  
44 findings between studies and methods.  
45
- 46 • Applying different forecasting methods to the same data and exploring the  
47 predictive ability of non-environmental variables, including transmission reducing  
48  
49  
50  
51  
52  
53  
54  
55  
56  
57  
58  
59  
60

1  
2  
3 interventions, are necessary next steps as they will help determine the optimal  
4  
5 approach and predictors for malaria forecasting.  
6  
7

### 8 **Strengths and limitations of this study**

9

- 10 • The strength of this review is that it is the first review to systematically assess  
11 malaria forecasting methods and predictors, and the recommendations in the  
12 review, if followed, should lead to improvement in the quality of malaria  
13 forecasting.  
14  
15  
16  
17  
18  
19
- 20 • A limitation of a literature review is that unpublished methods, if any, are omitted  
21 from this review.  
22  
23  
24  
25  
26  
27  
28  
29  
30  
31  
32  
33  
34  
35  
36  
37  
38  
39  
40  
41  
42  
43  
44  
45  
46  
47  
48  
49  
50  
51  
52  
53  
54  
55  
56  
57  
58  
59  
60

## INTRODUCTION

In 1911, Christophers<sup>1</sup> developed an early warning system for malaria epidemics in Punjab based upon rainfall, fever-related deaths, and wheat prices. Since that initial system, researchers and practitioners have continued to search for determinants of spatial and temporal variability of malaria to improve systems for forecasting disease burden. Malaria forecasting is now conducted in many countries and typically uses data on environmental risk factors, such as climatic conditions, to forecast incidence for a specific geographic area over a certain period of time.

Malaria can be forecasting using an assortment of methods and significant malaria predictors have been identified in a variety of settings. Our objective was to identify and assess methods, including predictors, used to forecast malaria. This review is intended to serve as a resource for malaria researchers and practitioners to inform future forecasting studies.

## METHODS

We included in our scoping review studies that forecasted incidence, prevalence, or epidemics of malaria over time. Whereas a systematic review is guided by a highly focused research question, a scoping review covers a subject area comprehensively by examining the extent, range, and nature of research activity on a topic.<sup>2</sup> The studies had to use models that included prior malaria incidence, prevalence, or epidemics as a predictor. A description of the forecasting model and an assessment of the forecast accuracy of the model were requirements for inclusion. Studies were restricted to human populations and to autochthonous transmission settings. We excluded studies that provided only spatial predictions, exploratory analysis (e.g., assessing temporal correlations), mortality predictions, and/or individual-level transmission modelling.

1  
2  
3 Commentaries, descriptive reports, or studies that did not include original research were  
4  
5 also excluded. Additionally, for studies that were related (e.g., same setting and same  
6  
7 methods with different time periods), the study with the most comprehensive data was  
8  
9 included in the review.  
10  
11

12  
13 A review protocol was developed and electronic search strategies were guided by  
14  
15 a librarian experienced in systematic and scoping reviews. Papers were identified using  
16  
17 medical subject headings and key word combinations and truncations: [“forecast\*” or  
18  
19 “predictive model\*” or “prediction model\*” or “time serie\*” or “time-serie\*”; AND  
20  
21 “malaria\*”]. The searches were not restricted by year or language although our searches  
22  
23 were restricted by the historical time periods of the databases. The citation searches  
24  
25 began on April 18, 2011 and the final citation search was conducted on May 29, 2012.  
26  
27 We searched the following databases: CAB Abstracts (1910-2012 Week 20), EMBASE  
28  
29 (1947-2012 May 28), Global Health (1910-April 2012), MEDLINE (1948-May Week 3  
30  
31 2012), ProQuest Dissertations & Theses (1861-May 29, 2012), and Web of Science  
32  
33 (1899-May 28, 2012). We performed manual searches of the Malaria Journal (2000-May  
34  
35 29, 2012) and the American Journal of Tropical Medicine and Hygiene (1921-May  
36  
37 2012). Grey literature was also searched using Google Scholar, based upon the same key  
38  
39 words used to search the databases. Additionally, the websites of the World Health  
40  
41 Organization and the United States Agency for International Development were also  
42  
43 examined for any relevant literature. To ensure that all appropriate references were  
44  
45 identified, hand searching of reference lists of all included studies was conducted and any  
46  
47 potentially relevant references were **incorporated into** the review process.  
48  
49  
50  
51  
52  
53  
54

55 The citations were imported into EndNote X5 (Thomas Reuters) for management.  
56  
57 Two main reviewers (KZ, AV) examined all citations in the study selection process with  
58  
59  
60



1  
2  
3 the exception of articles in Chinese, which were reviewed by a third reviewer (ZS). The  
4  
5 first stage of review involved each reviewer independently identifying potentially  
6  
7 relevant studies based upon information provided in the title and abstract. If it was  
8  
9 uncertain whether to include or exclude a study during the first stage of review, the  
10  
11 citation was kept and included in the full article review.  
12  
13

14  
15 The second stage of review involved each reviewer independently identifying  
16  
17 potentially relevant studies based upon full article review; data abstraction occurred for  
18  
19 those articles that met the inclusion criteria. From each study, we abstracted the  
20  
21 following: setting, outcome, covariates, data source(s), time frame of observed data,  
22  
23 forecasting and model evaluation methodologies, final models and associated measures  
24  
25 of prediction accuracy. Quality of the included studies was not assessed as the objective  
26  
27 was to conduct a scoping review and not a systematic review. Any discordance among  
28  
29 the reviewers regarding inclusion or exclusion of studies or with respect to the  
30  
31 information abstracted from the included studies was resolved by consultation with  
32  
33 another author (DB).  
34  
35  
36  
37

## 38 **RESULTS**

39  
40 Our search identified 613 potentially relevant articles for the scoping review after  
41  
42 duplicate citations were removed (figure 1). We identified 29 different studies that met  
43  
44 our inclusion criteria for this review; they are described briefly in table 1. Malaria  
45  
46 forecasting has been conducted in 13 different countries with China as the most frequent  
47  
48 site of malaria forecasting. The size of the geographic region of study ranged from  
49  
50 municipal level to larger administrative divisions such as country and provinces or  
51  
52  
53  
54  
55  
56  
57  
58  
59  
60

**Table 1. Characteristics of malaria forecasting studies included in review (n=29)**

| Authors<br>(reference no.)            | Population and setting                                                                        | Model specifics                                                                                               | Malaria<br>outcome            | No. of data points used<br>for training/testing                         | Evaluation measure                                                                     |
|---------------------------------------|-----------------------------------------------------------------------------------------------|---------------------------------------------------------------------------------------------------------------|-------------------------------|-------------------------------------------------------------------------|----------------------------------------------------------------------------------------|
| <i>Regression forecasting studies</i> |                                                                                               |                                                                                                               |                               |                                                                         |                                                                                        |
| Adimi et al. <sup>3</sup>             | Community health post data from 2004-7 for 23 provinces in Afghanistan; clinical confirmation | 23 linear regressions (1 for each province); included autoregressive, seasonal and trend parameters           | Monthly cases                 | 31/6 (varied between provinces but last 6 months used only for testing) | Root mean squared error & absolute difference                                          |
| Chatterjee and Sarkar <sup>4</sup>    | Municipal data for 2002-5 for Chennai city, India; microscopic confirmation                   | Logistic regression; polynomial and autoregressive parameters                                                 | Monthly slide positivity rate | 36/1                                                                    | 95% CI (for predicted value and compared to observed)                                  |
| Gomez-Elipse et al. <sup>5</sup>      | Health service data from 1997-2003 for Karuzi province, Burundi; clinical confirmation        | Linear regression; adjusted for population, lagged weather covariates, autoregressive and seasonal parameters | Monthly incidence             | 60/24; 1 month ahead forecasts                                          | 95% CI, correlation, p-value trend line of difference (between predicted and observed) |

1  
2  
3  
4  
5  
6  
7  
8  
9  
10  
11  
12  
13  
14  
15  
16  
17  
18  
19  
20  
21  
22  
23  
24  
25  
26  
27  
28  
29  
30  
31  
32  
33  
34  
35  
36  
37  
38  
39  
40  
41  
42  
43  
44  
45  
46  
47  
48  
49

|                                |                                                                                                       |                                                                                                                                                            |                                                  |                                                  |                                                              |
|--------------------------------|-------------------------------------------------------------------------------------------------------|------------------------------------------------------------------------------------------------------------------------------------------------------------|--------------------------------------------------|--------------------------------------------------|--------------------------------------------------------------|
| Haghdooost et al. <sup>6</sup> | District health centre data from 1994-2001 for Kahnooj District, Iran; microscopic confirmation       | Separate Poisson regressions for <i>P. vivax</i> and <i>P. falciparum</i> ; population offset, lagged weather covariates, seasonality and trend parameters | 10-day cases                                     | 213/73                                           | Average percent error                                        |
| Rahman et al. <sup>7</sup>     | Hospital data from 1992-2001 for all divisions of Bangladesh; clinical confirmation                   | 4 linear regressions (1 for each administrative division and 1 for all of Bangladesh); environmental covariate for weeks of highest correlation            | Yearly cases                                     | 10, 1 year was removed from series at a time     | Root mean squared error & relative bias (observed-predicted) |
| Roy et al. <sup>8</sup>        | Municipal data for Chennai city (2002-4) and Mangalore city (2003-7), India; microscopic confirmation | 2 linear regressions (1 for each city); adjusted for population, lagged weather covariates, autoregressive term, interaction terms, polynomial             | Monthly SPR (Chennai), monthly cases (Mangalore) | 28/8 (Chennai), 48/12 (Mangalore); 1 month ahead | 95% CI                                                       |

|    |                           |                       |                     |              |                           |
|----|---------------------------|-----------------------|---------------------|--------------|---------------------------|
| 1  |                           |                       |                     |              |                           |
| 2  |                           |                       |                     |              |                           |
| 3  |                           |                       |                     |              |                           |
| 4  |                           |                       |                     |              |                           |
| 5  |                           |                       | terms               |              |                           |
| 6  |                           |                       |                     |              |                           |
| 7  | Teklehaimanot et          | Health facility data  | 10 Poisson          | Weekly cases | 572 (varied between       |
| 8  | al. <sup>9</sup>          | from 1990-2000 for    | regressions (1 for  |              | districts, training &     |
| 9  |                           | all districts in      | each district);     |              | testing); 52 weeks        |
| 10 |                           | Ethiopia; microscopic | lagged weather      |              | (year) were removed       |
| 11 |                           | confirmation          | covariates,         |              | from series at a time; 1- |
| 12 |                           |                       | autoregressive      |              | 4 week ahead forecasts    |
| 13 |                           |                       | term, time trend    |              |                           |
| 14 |                           |                       | and indicator       |              |                           |
| 15 |                           |                       | covariates          |              |                           |
| 16 |                           |                       | for week of the     |              |                           |
| 17 |                           |                       | year                |              |                           |
| 18 |                           |                       |                     |              |                           |
| 19 |                           |                       |                     |              |                           |
| 20 |                           |                       |                     |              |                           |
| 21 | Xiao et al. <sup>10</sup> | Medical and health    | Poisson             | Monthly      | 144/12                    |
| 22 |                           | unit data from 1995-  | regression; lagged  | incidence    |                           |
| 23 |                           | 2007 for Hainan       | weather covariates, |              | T-test (predictive value  |
| 24 |                           | province, China;      | autoregressive      |              | significantly different   |
| 25 |                           | microscopic           | term                |              | than actual)              |
| 26 |                           | confirmation          |                     |              |                           |
| 27 |                           |                       |                     |              |                           |
| 28 |                           |                       |                     |              |                           |
| 29 |                           |                       |                     |              |                           |
| 30 | Yacob and                 | Medical data from     | 19 linear           | Seasonal     |                           |
| 31 | Swaroop <sup>11</sup>     | 1944-6 for all health | regressions (1 for  | epidemic     | Coefficient of            |
| 32 |                           | districts in Punjab;  | each district);     | figure*      | correlation (between      |
| 33 |                           | clinical confirmation | include             |              | actual and predicted      |
| 34 |                           |                       | coefficients of     |              | epidemic figure)          |
| 35 |                           |                       | correlation         |              |                           |
| 36 |                           |                       | between rainfall    |              |                           |
| 37 |                           |                       | and epidemic        |              |                           |
| 38 |                           |                       | figures from 1914   |              |                           |
| 39 |                           |                       | to 1943             |              |                           |
| 40 |                           |                       |                     |              |                           |
| 41 |                           |                       |                     |              |                           |
| 42 |                           |                       |                     |              |                           |
| 43 |                           |                       |                     |              |                           |
| 44 |                           |                       |                     |              |                           |
| 45 |                           |                       |                     |              |                           |
| 46 |                           |                       |                     |              |                           |
| 47 |                           |                       |                     |              |                           |
| 48 |                           |                       |                     |              |                           |
| 49 |                           |                       |                     |              |                           |

1  
2  
3  
4  
5  
6  
7  
8  
9  
10  
11  
12  
13  
14  
15  
16  
17  
18  
19  
20  
21  
22  
23  
24  
25  
26  
27  
28  
29  
30  
31  
32  
33  
34  
35  
36  
37  
38  
39  
40  
41  
42  
43  
44  
45  
46  
47  
48  
49

|                                  |                                                                                                          |                                                                                                                                                                       |                                          |                                                                                                                    |                                                              |
|----------------------------------|----------------------------------------------------------------------------------------------------------|-----------------------------------------------------------------------------------------------------------------------------------------------------------------------|------------------------------------------|--------------------------------------------------------------------------------------------------------------------|--------------------------------------------------------------|
| Yan et al. <sup>12</sup>         | Municipal data from 1951-2001 for Chongquin city, China                                                  | Linear regression; logarithm curve                                                                                                                                    | Yearly cases                             | 50/1                                                                                                               | Visual inspection of predicted within range of actual values |
| <i>ARIMA forecasting studies</i> |                                                                                                          |                                                                                                                                                                       |                                          |                                                                                                                    |                                                              |
| Abeku et al. <sup>13</sup>       | Health clinics data from 1986-99 for 20 areas in Ethiopia; mixture of microscopic and clinical confirmed | 20 models (1 for each area) compared approaches: Overall average, seasonal average, seasonal adjustment, ARIMA                                                        | Monthly cases                            | 168/12 (varied between areas but last 12 months only used for testing); 1-12 month ahead forecasts                 | Average forecast error                                       |
| Briët et al. <sup>14</sup>       | Health facility data from 1972-2005 for all districts in Sri Lanka; microscopic confirmation             | 25 models (1 for each district) compared approaches: Holt-Winters, ARIMA (seasonality assessed with fixed effects or harmonics) and SARIMA; lagged weather covariates | Monthly cases of malaria slide positives | 180/204 (varied between districts but approximately 50% of series reserved for testing); 1-4 month ahead forecasts | Mean absolute relative error                                 |
| Liu et al. <sup>15</sup>         | Data from 2004-10                                                                                        | SARIMA                                                                                                                                                                | Monthly                                  | 72/12                                                                                                              | Visual (plot of                                              |

|                             |                                                                                                   |                                                                              |                         |                                          |                                         |
|-----------------------------|---------------------------------------------------------------------------------------------------|------------------------------------------------------------------------------|-------------------------|------------------------------------------|-----------------------------------------|
|                             | for China                                                                                         |                                                                              | incidence               |                                          | predicted vs. observed)                 |
| Wangdi et al. <sup>16</sup> | Health center data from 1994-2008 for 7 districts in Bhutan; microscopic and antigen confirmation | 7 models (1 for each district): SARIMA and ARIMAX; lagged weather covariates | Monthly cases           | 144/24                                   | Mean average percent error              |
| Wen et al. <sup>17</sup>    | Data from 1991-2002 for Wanning County, China                                                     | SARIMA                                                                       | Monthly incidence       | 252/12                                   | 95% CI                                  |
| Zhang et al. <sup>18</sup>  | CDC data from 1959-79 for Jinan city, China; clinical confirmation                                | SARIMA; lagged weather covariates                                            | Monthly cases           | 84/120 (removed 1967 & 1968 from series) | Visual (plot of predicted vs. observed) |
| Zhou et al. <sup>19</sup>   | Data from 1996-2007 for Huaiyuan County, China; microscopic and clinical confirmation             | SARIMA                                                                       | Monthly incidence       | 108/12                                   | Average error                           |
| Zhu et al. <sup>20</sup>    | Data from 1998-2007 for Huaiyuan and Tongbai counties, China                                      | SARIMA                                                                       | Monthly incidence rates | 84/24; 1-12 month ahead forecasts        | 95% CI & error                          |

1  
2  
3  
4  
5  
6  
7  
8  
9  
10  
11  
12  
13  
14  
15  
16  
17  
18  
19  
20  
21  
22  
23  
24  
25  
26  
27  
28  
29  
30  
31  
32  
33  
34  
35  
36  
37  
38  
39  
40  
41  
42  
43  
44  
45  
46  
47  
48  
49

*Mathematical forecasting studies*

|                              |                                                                                                                                              |                                                                                                              |                                                                                                 |                                                                     |                                                          |
|------------------------------|----------------------------------------------------------------------------------------------------------------------------------------------|--------------------------------------------------------------------------------------------------------------|-------------------------------------------------------------------------------------------------|---------------------------------------------------------------------|----------------------------------------------------------|
| Gaudart et al. <sup>21</sup> | Data from cohort of children from 1996-2000 in Bancoumana (municipality), Mali from 1996-2006; microscopic confirmation                      | VSEIRS model                                                                                                 | Monthly incidence rate                                                                          | 60 (training & testing); 15 day, 1 month, 2 month, season forecasts | Mean absolute percentage error & root mean squared error |
| Laneri et al. <sup>22</sup>  | Health centre data (passive and active surveillance) for Kutch (1987-2007) and Balmer (1985-2005) Districts, India; microscopic confirmation | 2 models (1 for each district); compared 2 types of VSEIRS model to linear and negative binomial regressions | Monthly incidence for parameter estimation; Seasonal totals (Sept-Dec) for epidemic forecasting | 240 (training & testing); 1 to 4 month ahead forecasts              | Weighted mean square error & prediction likelihood       |

*Neural network forecast studies*

|                            |                                                                                         |                                              |                   |                                      |                                    |
|----------------------------|-----------------------------------------------------------------------------------------|----------------------------------------------|-------------------|--------------------------------------|------------------------------------|
| Cunha et al. <sup>23</sup> | Ministry of Health data from 2003-9 for Cornwall City, Brazil; microscopic confirmation | Compared neural network to linear regression | Monthly cases     | 72/12; 3, 6, and 12 months forecasts | Absolute error & mean square error |
| Gao et al. <sup>24</sup>   | Data from 1994-9 for Honghe State, China                                                | Neural network                               | Monthly incidence | 48/12                                | Percent error                      |

|    |                            |                                                                                              |                                                                                                 |                            |       |                                                                                |
|----|----------------------------|----------------------------------------------------------------------------------------------|-------------------------------------------------------------------------------------------------|----------------------------|-------|--------------------------------------------------------------------------------|
| 1  |                            |                                                                                              |                                                                                                 |                            |       |                                                                                |
| 2  |                            |                                                                                              |                                                                                                 |                            |       |                                                                                |
| 3  |                            |                                                                                              |                                                                                                 |                            |       |                                                                                |
| 4  |                            |                                                                                              |                                                                                                 |                            |       |                                                                                |
| 5  |                            |                                                                                              |                                                                                                 |                            |       |                                                                                |
| 6  |                            |                                                                                              |                                                                                                 |                            |       |                                                                                |
| 7  |                            |                                                                                              |                                                                                                 |                            |       |                                                                                |
| 8  | Kiang et al. <sup>25</sup> | Hospital and clinic data from 1994-2001 for 19 provinces, Thailand; microscopic confirmation | 19 neural networks (1 for each province); various architectures used (varied by province)       | Monthly incidence          | 84/12 | Root mean square error                                                         |
| 9  |                            |                                                                                              |                                                                                                 |                            |       |                                                                                |
| 10 |                            |                                                                                              |                                                                                                 |                            |       |                                                                                |
| 11 |                            |                                                                                              |                                                                                                 |                            |       |                                                                                |
| 12 |                            |                                                                                              |                                                                                                 |                            |       |                                                                                |
| 13 |                            |                                                                                              |                                                                                                 |                            |       |                                                                                |
| 14 |                            |                                                                                              |                                                                                                 |                            |       |                                                                                |
| 15 |                            |                                                                                              |                                                                                                 |                            |       |                                                                                |
| 16 |                            |                                                                                              |                                                                                                 |                            |       |                                                                                |
| 17 |                            |                                                                                              | <i>Other forecasting methods</i>                                                                |                            |       |                                                                                |
| 18 |                            |                                                                                              |                                                                                                 |                            |       |                                                                                |
| 19 | Fang et al. <sup>26</sup>  | Data from 1956-88 for Xuzhou City, China                                                     | Grey and Grey Verhulst models (1,1)                                                             | Yearly incidence           | 30/2  | Percent error                                                                  |
| 20 |                            |                                                                                              |                                                                                                 |                            |       |                                                                                |
| 21 |                            |                                                                                              |                                                                                                 |                            |       |                                                                                |
| 22 |                            |                                                                                              |                                                                                                 |                            |       |                                                                                |
| 23 |                            |                                                                                              |                                                                                                 |                            |       |                                                                                |
| 24 | Gao et al. <sup>27</sup>   | Data from 1998-2005 for Longgang District, China                                             | Grey model (1,1)                                                                                | Yearly incidence           | 6/1   | Error & percent error                                                          |
| 25 |                            |                                                                                              |                                                                                                 |                            |       |                                                                                |
| 26 |                            |                                                                                              |                                                                                                 |                            |       |                                                                                |
| 27 |                            |                                                                                              |                                                                                                 |                            |       |                                                                                |
| 28 |                            |                                                                                              |                                                                                                 |                            |       |                                                                                |
| 29 | Guo et al. <sup>28</sup>   | Data from 1988-2010 China                                                                    | Grey model (1,1)                                                                                | Yearly incidence           | 21/2  | Visual (plot of predicted vs. observed)                                        |
| 30 |                            |                                                                                              |                                                                                                 |                            |       |                                                                                |
| 31 |                            |                                                                                              |                                                                                                 |                            |       |                                                                                |
| 32 | Gill <sup>29</sup>         | Medical data from 1925-6 for health districts in Punjab; clinical confirmation               | 29 forecasts consisting of visual inspection of rainfall, spleen rates, and epidemic potential† | Seasonal epidemic (yes/no) |       | Qualitative comparison of prediction (presence of epidemic) to epidemic figure |
| 33 |                            |                                                                                              |                                                                                                 |                            |       |                                                                                |
| 34 |                            |                                                                                              |                                                                                                 |                            |       |                                                                                |
| 35 |                            |                                                                                              |                                                                                                 |                            |       |                                                                                |
| 36 |                            |                                                                                              |                                                                                                 |                            |       |                                                                                |
| 37 |                            |                                                                                              |                                                                                                 |                            |       |                                                                                |
| 38 |                            |                                                                                              |                                                                                                 |                            |       |                                                                                |
| 39 |                            |                                                                                              |                                                                                                 |                            |       |                                                                                |
| 40 |                            |                                                                                              |                                                                                                 |                            |       |                                                                                |
| 41 |                            |                                                                                              |                                                                                                 |                            |       |                                                                                |
| 42 |                            |                                                                                              |                                                                                                 |                            |       |                                                                                |
| 43 |                            |                                                                                              |                                                                                                 |                            |       |                                                                                |
| 44 |                            |                                                                                              |                                                                                                 |                            |       |                                                                                |
| 45 |                            |                                                                                              |                                                                                                 |                            |       |                                                                                |
| 46 |                            |                                                                                              |                                                                                                 |                            |       |                                                                                |
| 47 |                            |                                                                                              |                                                                                                 |                            |       |                                                                                |
| 48 |                            |                                                                                              |                                                                                                 |                            |       |                                                                                |
| 49 |                            |                                                                                              |                                                                                                 |                            |       |                                                                                |



1  
2  
3  
4  
5  
6  
7  
8  
9  
10  
11  
12  
13  
14  
15  
16  
17  
18  
19  
20  
21  
22  
23  
24  
25  
26  
27  
28  
29  
30  
31  
32  
33  
34  
35  
36  
37  
38  
39  
40  
41  
42  
43  
44  
45  
46  
47  
48  
49

|                             |                                                                                                          |                                                                                                              |                                    |                                                              |                                                         |
|-----------------------------|----------------------------------------------------------------------------------------------------------|--------------------------------------------------------------------------------------------------------------|------------------------------------|--------------------------------------------------------------|---------------------------------------------------------|
| Medina et al. <sup>30</sup> | Community health center data from 1996-2004 (14 centers) for Niono District, Mali; clinical confirmation | Multiplicative Holt-Winters model, age-specific rates (3 age groups); compared to seasonal adjustment method | Monthly malaria consultation rates | 36/72; 2 & 3 month ahead forecasts; one step ahead forecasts | mean absolute percentage error & 95% CI                 |
| Xu and Jin <sup>31</sup>    | Data from 2000-5 for Jiangsu Province, China                                                             | Grey model                                                                                                   | Yearly cases                       | 4/1                                                          | Visual (plot of predicted vs. observed number of cases) |

---

CI, confidence interval; ARIMA, auto-regressive integrated moving average; SARIMA, seasonal auto-regressive integrated moving average; ARIMAX, auto-regressive integrated moving average with exogenous input; VSEIRS: vector-susceptible-exposed-infected-recovered-susceptible model

\*Seasonal epidemic figure is the ratio of October incidence to mean spring incidence

†Epidemic potential is the coefficient of variability of fevers during the month of October for the periods of 1868-1921

districts. Almost all of the studies (97%) used health clinic records of malaria infections from the general population as their data source for malaria infections, with one study using cohort data. Eleven (38%) of the 29 studies used laboratory confirmation of malaria cases (microscopy and/or rapid diagnostic tests), seven (24%) used clinical confirmation, and two (7%) used a mixture of clinical and microscopic confirmation. Nine studies did not state whether they used clinical or microscopic confirmation of malaria.

### Forecasting studies

The forecasting approaches included statistical modelling, mathematical modelling, and machine learning methods. The statistical methods included generalized linear models, Auto-Regressive Integrated Moving Average (ARIMA) models,<sup>32</sup> and Holt-Winters models<sup>33</sup>. The mathematical models were based upon extensions of the Ross-MacDonald Susceptible-Infected-Recovered malaria transmission model.<sup>34</sup> Other authors predicted malaria incidence using neural networks, a machine learning technique.<sup>35</sup>

**Table 2**

| Forecasting method  | No. of studies (ref. no.)                             |
|---------------------|-------------------------------------------------------|
| GLM                 | 12 <sup>3, 4, 5, 6, 7, 8, 9, 11, 12, 10, 22, 23</sup> |
| ARIMA               | 7 <sup>13, 14, 15, 16, 17, 18, 19, 20</sup>           |
| Grey methods        | 4 <sup>26, 27, 28, 31</sup>                           |
| Smoothing methods*  | 3 <sup>13, 14, 30</sup>                               |
| Neural networks     | 3 <sup>23, 24, 25</sup>                               |
| Mathematical models | 2 <sup>21, 22</sup>                                   |
| Visual              | 1 <sup>29</sup>                                       |

Bolded reference indicates multiple comparisons

\*Includes Holt Winters, seasonal average, seasonally adjusted average, and simple average

1  
2  
3 Twelve studies (41%) included in the review used generalized linear models to  
4 forecast malaria counts, rates, or proportions through linear, Poisson, or logistic  
5 regression. All but one of the regression models included climate related covariates such  
6 as rainfall, temperature, vegetation, and/or relative humidity.<sup>12</sup> Typically, the weather  
7 covariates were lagged, to account for the delayed effects of weather on malaria  
8 infections. Two studies<sup>4, 8</sup> explored the effects of including covariates as higher order  
9 polynomials. Several of the studies used a generalized linear model approach to time  
10 series analysis by including previous (lagged) malaria incidence as an autoregressive  
11 covariate in the model. Some models included terms for season or year to account for  
12 seasonal and annual variations.

13  
14  
15 Seven studies (24%) used forecasting approaches based on ARIMA modelling  
16 varied, with some including a seasonal component (SARIMA). While not explicitly  
17 stated, many studies used a transfer function model, also known as ARIMAX. Typically,  
18 these ARIMA based models incorporated various meteorological series as covariates  
19 although one study also included data on the malaria burden in neighboring districts.<sup>14</sup>

20  
21  
22 Four studies (14%) from China used the Grey method for malaria forecasting,  
23 none of which incorporated predictors other than malaria incidence.<sup>26-28, 31</sup> There were  
24 two studies (7%) that used mathematical models.<sup>21, 22</sup> Gaudart et al.<sup>21</sup> included a vector  
25 component in a susceptible-infected-recovered (SIR) type model and used data from a  
26 cohort of children, remote sensing data, literature, and expert opinions of entomologists  
27 and parasitologists. The study by Laneri et al.<sup>22</sup> used a vector-susceptible-exposed-  
28 infected-recovered-susceptible (VSEIRS) model although they incorporated two different  
29 pathways from recovery to susceptibility that were based upon different time scales  
30 (seasonal and inter-annual), mimicking different transmission intensities. They found that

1  
2  
3 rainfall had a significant effect on the inter-annual variability of epidemic malaria and  
4 including rainfall as a predictor improved forecast accuracy. The parameters in their  
5  
6 models were selected based upon the literature as well as laboratory findings.  
7  
8  
9

10 We identified three studies (10%) that used neural networks in their analyses, and  
11 each study used different input data and a unique network structure.<sup>23-25</sup> Two of the  
12 studies used weather variables to predict malaria incidence.<sup>24, 25</sup> Gao et al.<sup>24</sup> also included  
13 evaporation and sunshine hours to predict malaria incidence, two variables that were not  
14 included in any other study.  
15  
16  
17  
18  
19  
20  
21

22 As shown in table 3, climate-related predictors were used consistently in  
23 forecasting models, with the most common predictors being rainfall, relative humidity,  
24 temperature, and normalized difference vegetation index. One study accounted for the  
25 effect of malaria incidence in neighboring districts, but it was not a significant predictor  
26 and was excluded from the final model.<sup>14</sup> The mathematical models included non-time  
27 varying parameters such as the reporting fraction of cases (proportion of malaria cases in  
28 a population that is reported to public health), average life expectancy, and several vector  
29 characteristics, which are listed in table 4.  
30  
31  
32  
33  
34  
35  
36  
37  
38  
39  
40  
41  
42  
43  
44  
45  
46  
47  
48  
49  
50  
51  
52  
53  
54  
55  
56  
57  
58  
59  
60

**Table 3. Time varying predictors considered in malaria forecasting models**

| Predictor                             | No. of studies (ref. no.)                    |
|---------------------------------------|----------------------------------------------|
| <b>Rainfall</b>                       |                                              |
| Total rainfall                        | 11 <sup>3-6, 9, 10, 14, 16, 18, 22, 25</sup> |
| Average rainfall                      | 2 <sup>8, 24</sup>                           |
| Rainy day index*                      | 1 <sup>14</sup>                              |
| Number of rainy days/month            | 1 <sup>24</sup>                              |
| <b>Humidity</b>                       |                                              |
| Average relative humidity             | 7 <sup>6, 8, 10, 16, 18, 24, 25</sup>        |
| Minimum humidity                      | 1 <sup>4</sup>                               |
| Maximum humidity                      | 1 <sup>4</sup>                               |
| <b>Temperature</b>                    |                                              |
| Maximum air temperature               | 8 <sup>4-6, 9, 10, 16, 18, 24</sup>          |
| Minimum air temperature               | 7 <sup>4, 5, 9, 10, 16, 18, 24</sup>         |
| Average air temperature               | 4 <sup>8, 10, 24, 25</sup>                   |
| Average LST                           | 2 <sup>3, 25</sup>                           |
| Temperature condition index           | 1 <sup>7</sup>                               |
| <b>Vegetation</b>                     |                                              |
| Average NDVI                          | 2 <sup>3, 5</sup>                            |
| Maximum NDVI                          | 2 <sup>21, 25</sup>                          |
| Vegetation condition index            | 1 <sup>7</sup>                               |
| <b>Other environmental predictors</b> |                                              |
| Average air pressure                  | 2 <sup>18, 24</sup>                          |
| Average air evaporation               | 1 <sup>24</sup>                              |
| Sunshine hours                        | 1 <sup>24</sup>                              |
| <b>Other</b>                          |                                              |
| Malaria in neighboring districts      | 1 <sup>14</sup>                              |
| Population                            | 1 <sup>4</sup>                               |

LST, land surface temperature; NDVI, normalized difference vegetation index

\*Rainy day index: dividing the number of days per month when rainfall was larger than zero by the number of days that a reading for rainfall was available

**Table 3. Parameters included in the mathematical forecasting models**

| Predictor                                                                                    | Reference no. |
|----------------------------------------------------------------------------------------------|---------------|
| Vector                                                                                       |               |
| Mean developmental delay                                                                     | 22            |
| Number of bites per night                                                                    | 21            |
| Probability of a susceptible becoming infected after one single bite from a contagious human | 21            |
| Mortality per day                                                                            | 21            |
| Density                                                                                      | 21            |
| Length of gonotrophic cycle                                                                  | 21            |
| Time lag of NDVI influence                                                                   | 21            |
| Lowest NDVI value to influence behaviour                                                     |               |
| Humans                                                                                       |               |
| Probability of a susceptible human becoming infected after one single infected bite          | 21            |
| Probability of becoming susceptible after being resistant                                    | 21, 22        |
| Probability of acquiring contagiousness                                                      | 21, 22        |
| Probability of losing contagiousness                                                         | 21, 22        |
| Average human life expectancy                                                                | 22            |
| Infectivity of quiescent cases relative to full-blown infections                             | 22            |
| Other                                                                                        |               |
| Reporting fraction*                                                                          | 22            |

NDVI, normalized difference vegetation index

\*Reporting fraction is the fraction of malaria cases in the population that are reported to public health

## Evaluation methods

Authors used different approaches to evaluate the accuracy of forecasting models. A typical approach was to segment the data into a model building or training portion with the other portion (the 'holdout' sample) used for model validation or assessing forecast accuracy. The cross-validation approach used by Rahman et al.<sup>7</sup> and Teklehaimanot et al.<sup>9</sup> excluded one year of data at a time, fit the model to the remaining data, computed forecast error (prediction residual) using data from the missing year, and then repeated the process for the subsequent years. The accuracy of the predictions was then estimated from the prediction residuals. Some of the studies used all the available data to fit a model and did not reserve data for assessing forecast accuracy.<sup>21, 22</sup>

Studies compared the forecasts to observed values using various measures: mean squared error, mean relative error, mean percentage error, correlation coefficients, paired t-tests (between predicted and observed values), 95% confidence intervals (of predicted values and determined if observed values fell within the interval), and visualizations (e.g. graphical representations of observed and predicted values).

## Comparison of forecasting methods

We could not compare the forecast accuracy of models from different studies due to the lack of common measures and the lack of scale independent measures. However, we briefly discuss the findings from studies that compared different methods within a single study.

Abeku et al.<sup>13</sup> found that their ARIMA models provided the least accurate forecasts when compared with variations of seasonal averages, and the most accurate forecasts were produced by the seasonal average that incorporated deviations from the last three observations (SA<sub>3</sub>). In contrast, Briet et al.<sup>14</sup> found that the most accurate model

1  
2  
3 varied by district and forecasting horizon, but the SARIMA approach tended to provide  
4 the most accurate forecasts, followed by an ARIMA model with seasonality modelled  
5 using a sine term, then Holt-Winters, with the SA<sub>3</sub> providing the least accurate forecasts.  
6  
7 They also considered independent time series, such as rainfall and malaria cases in  
8 neighboring districts, in the models. Medina et al.<sup>30</sup> determined that their Holt-Winters  
9 method provided more accurate forecasts and the accuracy did not deteriorate as rapidly  
10 as with the SA<sub>3</sub> method. Cunha et al.<sup>23</sup> found that their neural network provided more  
11 accurate predictions across all three forecast horizons (3, 6, and 12 months) when  
12 compared to a logistic regression model.  
13  
14  
15  
16  
17  
18  
19  
20  
21  
22  
23

## 24 DISCUSSION

25  
26  
27 Malaria forecasting can be an invaluable tool for malaria control and elimination  
28 efforts. A public health practitioner developed a simple forecasting method, which led to  
29 the first early warning system of malaria.<sup>1</sup> Forecasting methods for malaria have  
30 advanced since that early work, but the utility of more sophisticated models for clinical  
31 and public health decision-making is not always evident. The accuracy of forecasts is a  
32 critical factor in determining the practical value of a forecasting system. The variability in  
33 methods is a strength of malaria forecasting, as it allows for tailored approaches to  
34 specific settings and contexts. There should also be continued effort to develop new  
35 methods although common forecasting accuracy measures are essential as they will help  
36 determine the optimal approach with existing and future methods.  
37  
38  
39  
40  
41  
42  
43  
44  
45  
46  
47  
48  
49

50  
51 When performing forecasting, it is important to understand the assumptions of  
52 forecast models and understand the advantages and disadvantages of each. Forecast  
53 accuracy should always be measured on reserved data and common forecasting measures  
54 should be used to facilitate comparison between studies. One should explore non-climate  
55  
56  
57  
58  
59  
60



1  
2  
3 predictors, including transmission reducing interventions, as well as different forecasting  
4  
5 approaches based upon the same data.  
6  
7

### 8 **Differences between forecasting methods** 9

10 The regression approach to time series prediction attempts to model the serial  
11 autocorrelation in the data through the inclusion of autoregressive terms and/or sine and  
12 cosine functions for seasonality. Generalized linear regression models are used  
13 commonly and their main advantages are their flexibility and the intuitive nature of this  
14 approach for many people relative to ARIMA models. For example, the temporal  
15 dynamics observed in time series plots can be feasibly managed in generalized linear  
16 models by including several cyclic factors, interaction terms, and numerous predictors.<sup>36</sup>  
17 The main disadvantages are that generalized linear models do not naturally account for  
18 correlation in the errors<sup>37</sup> and the models may need to be complex to capture all the  
19 dynamics of the relationship within a series and between two or more series.<sup>38</sup> Failure to  
20 accurately model serial autocorrelation may bias the estimation of the effect of malaria-  
21 related variables **as well as underestimate the standard errors**. Crucially, the regression  
22 models residuals must be examined for autocorrelation and it was not always evident that  
23 this occurred in the studies we identified that used this method. Additionally, it was not  
24 apparent if any remedial measures were used to account for the effect of autocorrelation  
25 on estimates of variance, e.g. re-estimating standard errors using heteroskedasticity and  
26 autocorrelation consistent (HAC) estimators.<sup>39</sup>  
27  
28  
29  
30  
31  
32  
33  
34  
35  
36  
37  
38  
39  
40  
41  
42  
43  
44  
45  
46  
47  
48  
49

50 ARIMA models are designed to account for serial autocorrelation in time series;  
51 current values of a series can be explained as a function of past values and past shocks.<sup>38</sup>  
52  
53 With ARIMA models, once the series have been detrended through differencing, any  
54  
55 remaining seasonality can be modelled as part of additional autoregressive or moving  
56  
57  
58  
59  
60

1  
2  
3 average parameters of a SARIMA model. A rule of thumb is that 50 observations are a  
4  
5 minimal requirement for ARIMA models,<sup>37</sup> whereas SARIMA models require longer  
6  
7 time series. The transfer function model, ARIMAX, extends ARIMA by also including as  
8  
9 predictors current and/or past values of an independent variable. An advantage of  
10  
11 ARIMA models versus GLMs is that ARIMA models naturally represent features of  
12  
13 temporal patterns, such as seasonality and autocorrelation. As with generalized linear  
14  
15 regression models, the residuals of ARIMA models need to be examined for residual  
16  
17 correlation. Also, when incorporating an input series into the model, pre-whitening  
18  
19 should occur prior to the cross-correlation assessment for the transfer function models.  
20  
21 Pre-whitening is when the residuals from an ARIMA model for the input series are  
22  
23 reduced to 'white noise' and the same ARIMA model is applied to the output series.<sup>37</sup>  
24  
25 Authors did not always report that they pre-whitened the series prior to assessing cross-  
26  
27 correlations. The relationship between the two resulting residual series is then estimated  
28  
29 by the cross-correlation function. Without pre-whitening, the estimated cross-correlation  
30  
31 function may be distorted and misleading.  
32  
33  
34  
35  
36  
37

38  
39 Four studies from China used the Grey method for malaria forecasting.<sup>26-28, 31</sup> This  
40  
41 forecasting method is essentially a curve fitting technique based on a smoothed version of  
42  
43 the observed data.<sup>40, 41</sup> The Grey model appears most useful in predicting malaria when  
44  
45 using a very short time series and when there is a strong linear trend in the data. This is  
46  
47 due to the nature of the GM(1,1) model which will always generate either exponentially  
48  
49 increasing or decreasing series.<sup>42</sup> Its value in malaria prediction beyond that of the  
50  
51 simpler statistical modelling approaches is yet to be determined.  
52  
53  
54

55  
56 The approach to prediction differs between mathematical models and other  
57  
58 approaches such as generalized linear models, ARIMA and Grey models. The Ross-  
59  
60

1  
2  
3 **Macdonald mathematical model** divides the population under study into different  
4  
5 compartments such as susceptible, infected, and recovered, and uses differential  
6  
7 equations to model the transition over time of individuals from one group to another. By  
8  
9 using differential equations, these models can represent explicitly the dynamics of  
10  
11 malaria infection, mosquito populations and human susceptibility. The disadvantages of  
12  
13 mathematical models include the difficulty in finding appropriate, setting-specific data  
14  
15 for the parameters. Also, the computational complexity of these models increases with  
16  
17 the number of parameters, resulting in the omission of relevant features of malaria  
18  
19 dynamics in order for the model to be manageable.<sup>43</sup>

20  
21  
22 **A neural network is a machine learning method that connects a set of inputs (e.g.**  
23  
24 **weather covariates) to outputs (e.g. malaria counts).**<sup>44</sup> **The connection between inputs and**  
25  
26 **outputs are made via ‘neurons’ and the number of links and corresponding weights are**  
27  
28 **chosen to give the best possible fit to the training data.** Neural networks have been proven  
29  
30 to be useful in their capacity to handle non-linear relationships as well as a large number  
31  
32 of parameters, and also their ability to detect all possible interactions between predictor  
33  
34 variables.<sup>45</sup> Mathematical models and neural networks are able to capture thresholds or  
35  
36 limits on malaria transmission, which cannot be readily captured by statistical  
37  
38 approaches. For example, in generalized linear models, a small decrease in the  
39  
40 temperature leads to a small decrease in malaria incidence. Neural networks and  
41  
42 mathematical models can represent explicitly that there will be no malaria transmission  
43  
44 below a certain temperature. The disadvantages of neural networks include difficulties in  
45  
46 determining how the network is making its decision and its greater computational  
47  
48 burden;<sup>46</sup> both of which depend upon the number of input parameters included in the  
49  
50 model. Additionally, neural networks have a greater susceptibility to overfitting<sup>45</sup> and  
51  
52  
53  
54  
55  
56  
57  
58  
59  
60

1  
2  
3 several thousand observations are typically required to fit a neural network with  
4  
5 confidence.<sup>46</sup> Malaria time series are unlikely to contain several thousands of  
6  
7  
8 observations, perhaps unless the observations are aggregated over time (e.g., monthly)  
9  
10  
11 and location (e.g., national level).

12  
13 Researchers have examined many forecasting methods, but published articles tend  
14  
15 to describe the application of a single method to a unique dataset. Direct comparison of  
16  
17 methods would be easier if multiple malaria forecasting methods were applied to the  
18  
19 same data. This approach would allow identification of the methods that provide the most  
20  
21 accurate short-term, intermediate, and long-term forecasts, for a given setting and a set of  
22  
23 predictors. It would also allow exploration of gains in forecast accuracy by using a  
24  
25 weighted combination of forecasts from several models and/or methods.<sup>47</sup>

### 26 27 28 29 **Malaria predictors**

30  
31 It has been suggested that climate and meteorological predictors have greater  
32  
33 predictive power when modelling malaria incidence in areas with unstable transmission  
34  
35 as compared to areas with stable endemicity.<sup>48</sup> It is interesting to note that nearly all of  
36  
37 the models focused narrowly on a small number of environmental predictors despite the  
38  
39 importance of other predictors of malaria incidence, such as land use, bednets, indoor  
40  
41 residual spraying, and antimalarial resistance. Forecast accuracy may be weakened if  
42  
43 transmission reducing interventions are not considered in the models.  
44  
45  
46  
47

### 48 49 **Forecast evaluation**

50  
51 Model selection based upon model fitting criteria such as Akaike's information  
52  
53 criterion, Bayesian information criterion, or the coefficient of determination, are standard  
54  
55 measures considered when choosing a regression model. Using such measures to guide  
56  
57 forecast model selection may result in selecting models with a greater number of  
58  
59  
60

1  
2  
3 parameters and “over-fitting”, which tends to result in inaccurate forecasts.<sup>49</sup> For the  
4  
5 purposes of forecasting, visualizations of forecasts compared to observations and forecast  
6  
7 accuracy measures, such as the mean absolute forecast error, provide more direct and  
8  
9 intuitive model selection criteria.  
10  
11

12  
13 When choosing how much of the series to reserve for testing the model, it is  
14  
15 recommended to reserve at least as much as the maximum forecast horizon.<sup>50</sup> Cross-  
16  
17 validation is a more efficient use of data than partitioning a data set into train and test  
18  
19 segment, although it is more computational intensive. It is recommended in cross-  
20  
21 validation that only prior observations be used for testing a future value.<sup>50</sup>  
22  
23

24  
25 Various direct measures were used to estimate forecasting error. Absolute  
26  
27 measures, such as the mean absolute error (MAE), are relevant for measuring accuracy  
28  
29 within a particular series but not across series because the magnitude of the mean  
30  
31 absolute error depends on the scale of the data.<sup>51</sup> Percent errors, such as mean absolute  
32  
33 percent error (MAPE) are scale-independent but are not recommended when the data  
34  
35 involves 0 counts as MAPE cannot be calculated with 0 values. Also, the MAPE places a  
36  
37 heavier penalty on on forecasts that exceed the observed compared to those that are less  
38  
39 than the observed.<sup>52</sup> In economics, a measure called mean absolute scaled error (MASE)  
40  
41 has been recommended as a accuracy measure for forecasting.<sup>51</sup> We recommend  
42  
43 incorporating MASE into malaria forecast evaluation as this evaluation measure will  
44  
45 facilitate comparison between studies. We also recommend reporting MAE as it allows  
46  
47 an intuitive interpretation of the errors. Additionally, MAPE should be reported and a  
48  
49 constant such as 1, could replace the 0 values in the series, allowing the calculation of  
50  
51 MAPE. An advantage of MAPE as that it considers scale variance. For example, if we  
52  
53 observed 70 counts of malaria but predicted 60, MAPE would be 14.3, MAE 10, and  
54  
55  
56  
57  
58  
59  
60

1  
2  
3 MASE 0.7. If we observed 15 counts of malaria but predicted 5, MAPE would be 66.7,  
4 MAE 10, and MASE 0.7. MAPE and MASE could be used to compare findings across  
5  
6 series and studies, and also compared to one another to understand if and how they differ  
7  
8 in their ranking of forecast accuracy. The MAE, MAPE, and MASE should be provided  
9  
10 as site-specific measures for each forecasting horizon, as summary measures for each  
11  
12 site, and finally as summary measures for each forecasting horizon across all sites (within  
13  
14 a study).

## 15 16 17 18 19 20 **Conclusion**

21  
22 Accurate disease predictions and early warning signals of increased disease  
23  
24 burden can provide public health and clinical health services with the information  
25  
26 needed to strategically implement prevention and control measures. Potential barriers to  
27  
28 their usefulness in public health settings include the spatial and temporal resolution of  
29  
30 models and accuracy of prediction. Models that produce coarse forecasts may not  
31  
32 provide the precision necessary to guide targeted intervention efforts. Additionally,  
33  
34 technical skill and lack of readily available data may reduce the feasibility of model  
35  
36 utility in practice, which should be considered in developing malaria forecasting  
37  
38 models if the intent is to use these models in clinical or public health settings. Applying  
39  
40 different forecasting methods to the same data, exploring the predictive ability of non-  
41  
42 environmental variables, including transmission reducing interventions, and using  
43  
44 common forecast accuracy measures will allow malaria researchers to compare and  
45  
46 improve models and methods, and lead to the improvement in the quality of malaria  
47  
48 forecasting.

### Acknowledgements

We would like to thank various authors for responding to our questions and also to gratefully acknowledge Lorie Kloda for her assistance in our literature search strategies. We would especially like to thank the reviewers for critically reading the manuscript and providing insightful suggestions.

### Competing interests

None declared.

### Funding

This work was supported by the Canadian Institutes of Health Research Interdisciplinary Capacity Enhanced Team grant number HOA-80072.

## References

1. Christophers SR. Epidemic malaria of the Punjab: with a note of a method of predicting epidemic years. *Transactions of the Committee for the Study of Malaria in India* 1911;2:17-26.
2. Levac D, Colquhoun H, O'Brien KK. Scoping studies: advancing the methodology. *Implement Sci* 2010;5:69.
3. Adimi F, Soebiyanto RP, Safi N, *et al.* Towards malaria risk prediction in Afghanistan using remote sensing. *Malar J* 2010;9:125. doi:10.1186/1475-2875-9-1259
4. Chatterjee C, Sarkar RR. Multi-step polynomial regression method to model and forecast malaria incidence. *PLoS ONE* 2009;4:e4726. doi:10.1371/journal.pone.0004726
5. Gomez-Elipse A, Otero A, van Herp M, *et al.* Forecasting malaria incidence based on monthly case reports and environmental factors in Karuzi, Burundi, 1997-2003. *Malar J* 2007;6:129. doi:10.1186/1475-2875-6-129
6. Haghdoost AA, Alexander N, Cox J. Modelling of malaria temporal variations in Iran. *Trop Med Int Health* 2008;13:1501-8.
7. Rahman A, Kogan F, Roytman L, *et al.* Modelling and prediction of malaria vector distribution in Bangladesh from remote-sensing data. *Int J Remote Sens* 2011;32:1233-51.
8. Roy SB, Sarkar RR, Somdatta S. Theoretical investigation of malaria prevalence in two Indian cities using the response surface method. *Malar J* 2011;10:301. doi:10.1186/1475-2875-10-301
9. Teklehaimanot HD, Schwartz J, Teklehaimanot A, *et al.* Weather-based prediction of Plasmodium falciparum malaria in epidemic-prone regions of Ethiopia II. *Malar J* 2004;3:44. doi:10.1186/1475-2875-3-44



- 1  
2  
3 10. Xiao D, Long Y, Wang S, *et al.* Spatiotemporal distribution of malaria and the  
4 association between its epidemic and climate factors in Hainan, China. *Malar J*  
5  
6 2010;9:185. doi:10.1186/1475-2875-9-185  
7  
8  
9  
10 11. Yacob M, Swaroop S. Preliminary forecasts of the incidence of malaria in the Punjab.  
11  
12 *Indian Journal of Malariology* 1947;1:491-501.  
13  
14  
15 12. Yan W, Jiang S, Li J, *et al.* Establishment of a dynamic model of malaria outbreak in  
16 Chongqing municipality. *Journal of Tropical Medicine [Guangzhou]* 2007;7:801-3.  
17  
18  
19 13. Abeku TA, De Vlas SJ, Borsboom G, *et al.* Forecasting malaria incidence from  
20 historical morbidity patterns in epidemic-prone areas of Ethiopia: A simple seasonal  
21 adjustment method performs best. *Trop Med Int Health* 2002;7:851-7.  
22  
23  
24  
25 14. Briët OJ, Vounatsou P, Gunawardena DM, *et al.* Models for short term malaria  
26 prediction in Sri Lanka. *Malar J* 2008;7:76. doi:10.1186/1475-2875-7-76  
27  
28  
29  
30 15. Liu J, Qu B, He Q. Epidemiological analysis on malaria incidence in China from  
31 2004 to 2009 by time series model. *Chinese Journal of Vector Biology and Control*  
32  
33 2011;22:134-6.  
34  
35  
36  
37 16. Wangdi K, Singhasivanon P, Silawan T, Lawpoolsri S, White NJ, Kaewkungwal J.  
38 Development of temporal modelling for forecasting and prediction of malaria infections  
39 using time-series and ARIMAX analyses: a case study in endemic districts of Bhutan.  
40  
41 *Malar J* 2010;9:251. doi:10.1186/1475-2875-9-251  
42  
43  
44  
45  
46  
47 17. Wen L, Xu D, Lin M, *et al.* Prediction of malaria incidence in malaria epidemic area  
48 with time series model. *Journal of the Fourth Military Medical University* 2004;25:507-  
49  
50 10.  
51  
52  
53  
54  
55 18. Zhang Y, Bi P, Hiller JE. Meteorological variables and malaria in a Chinese  
56 temperate city: a twenty-year time-series data analysis. *Environ Int* 2010;36:439-45.  
57  
58  
59  
60

- 1  
2  
3  
4  
5  
6  
7  
8  
9  
10  
11  
12  
13  
14  
15  
16  
17  
18  
19  
20  
21  
22  
23  
24  
25  
26  
27  
28  
29  
30  
31  
32  
33  
34  
35  
36  
37  
38  
39  
40  
41  
42  
43  
44  
45  
46  
47  
48  
49  
50  
51  
52  
53  
54  
55  
56  
57  
58  
59  
60
19. Zhou S, Huang F, Shen Y. Application of ARIMA model on prediction of malaria incidence. *Journal of Pathogen Biology* 2007;2:284-6.
20. Zhu JM, Tang LH, Zhou SS, *et al.* Study on the feasibility for ARIMA model application to predict malaria incidence in an unstable malaria area. *Chinese Journal of Parasitology and Parasitic Diseases* 2007;25:232-6.
21. Gaudart J, Toure O, Dessay N, *et al.* Modelling malaria incidence with environmental dependency in a locality of Sudanese savannah area, Mali. *Malar J* 2009;8:61.  
doi:10.1186/1475-2875-8-61
22. Laneri K, Bhadra A, Ionides EL, *et al.* Forcing versus feedback: epidemic malaria and monsoon rains in northwest India. *PLoS Comput Biol* 2010;6.  
doi:10.1371/journal.pcbi.1000898
23. Cunha GB, Luitgards-Moura JF, Naves ELM, *et al.* Use of an artificial neural network to predict the incidence of malaria in the city of Canta, state of Roraima. *Revista da Sociedade Brasileira de Medicina Tropical* 2010;43:567-70.
24. Gao CY, Xiong HY, Yi D, *et al.* Study on meteorological factors-based neural network model of malaria. *Chinese Journal of Epidemiology* 2003;24:831-4.
25. Kiang R, Adimi F, Soika V, *et al.* Meteorological, environmental remote sensing and neural network analysis of the epidemiology of malaria transmission in Thailand. *Geospat Health* 2006;1:71-84.
26. Fang Y, Deng D, Gu ZC, *et al.* Interval division, forecasting and decline tendency estimation model of malaria incidence in Xuzhou City. *Chinese Journal of Parasitology and Parasitic Diseases* 1991;9:284-6.

- 1  
2  
3 27. Gao S, Liu J, Zhang R, *et al.* Establishment and estimation of a GM (1,1) grey model  
4 for forecasting of malaria epidemic situation in Shenzhen Longgang areas. *Journal of*  
5  
6 *Pathogen Biology* 2007;2:357-9.  
7  
8  
9  
10 28. Guo H, Ding H, Qu B, *et al.* A study on the trend of malaria incidence in China in the  
11 recent 20 years with GM (1,1). *Journal of Tropical Medicine [Guangzhou]* 2011;11:639-  
12  
13 40.  
14  
15  
16  
17 29. Gill CA. The forecasting of malaria epidemics with special reference to the malaria  
18 forecast for the year 1926. *Indian Journal of Medical Research* 1927;15:265-76.  
19  
20  
21  
22 30. Medina DC, Findley SE, Guindo B, *et al.* Forecasting non-stationary diarrhea, acute  
23 respiratory infection, and malaria time-series in Niono, Mali. *PLoS ONE* 2007;2.  
24  
25  
26  
27 doi:10.1371/journal.pone.0001181  
28  
29 31. Xu X, Jin X. The application of GM (1,1) grey model in the forecasting of malaria  
30 epidemic situation. *Chinese Journal of Parasitic Disease Control* 2005;18:178-9.  
31  
32  
33  
34 32. Box GEP, Jenkins GM, Reinsel GC. *Time series analysis: forecasting and control.*  
35  
36 Hoboken, NJ: John Wiley & Sons, 2008.  
37  
38  
39 33. Chatfield C. The Holt-Winters forecasting procedure. *Journal of the Royal Statistical*  
40  
41 *Society* 1978;27:264-79.  
42  
43  
44 34. MacDonald G. *The epidemiology and control of malaria.* London: Oxford University  
45 Press, 1957..  
46  
47  
48 35. Anderson JA. *An introduction to neural networks.* Cambridge, MA: The MIT Press,  
49  
50 1995.  
51  
52  
53 36. Darlington RB. *A comparison to ARIMA.*  
54  
55  
56 <http://www.psych.cornell.edu/darlington/series/series2.htm> (accessed 30 May 2012).  
57  
58  
59  
60

- 1  
2  
3  
4  
5  
6  
7  
8  
9  
10  
11  
12  
13  
14  
15  
16  
17  
18  
19  
20  
21  
22  
23  
24  
25  
26  
27  
28  
29  
30  
31  
32  
33  
34  
35  
36  
37  
38  
39  
40  
41  
42  
43  
44  
45  
46  
47  
48  
49  
50  
51  
52  
53  
54  
55  
56  
57  
58  
59  
60
37. Chatfield C. *The analysis of time series: an introduction*. London: Chapman & Hall, 2004.
38. Shumway RH, Stoffer DS. *Time series analysis and its applications: with R examples*. New York: Springer, 2006.
39. Zeileis A. Econometric computing with HC and HAC covariance matrix estimators. *Journal of Statistical Software* 2004;11:1-17.
40. Deng JL. Introduction to Grey system theory. *Journal of Grey System* 1989;1:1-24.
41. Lin KH, Liu BD. A gray system modelling approach to the prediction of calibration intervals. *IEEE Transactions of Instrumentation and Measurement* 2005;54:297-305.
42. Tseng FM, Yu HC, Tzeng GH. Applied hybrid grey model to forecast seasonal time series. *Technological Forecasting and Social Change* 2001;67:291-302.
43. Koella JC. On the use of mathematical models of malaria transmission. *Acta Trop* 1991;49:1-25.
44. Chatfield C. Neural networks: forecasting breakthrough or passing fad? *International Journal of Forecasting* 1993;9:1-3.
45. Tu JV. Advantages and disadvantages of using artificial neural networks versus logistic regression for predicting medical outcomes. *J Clin Epidemiol* 1996;49:1225-31.
46. Chatfield C. Forecasting in the 1990s. *Journal of the Royal Statistical Society* 1997;46:461-73.
47. Jose VRR, Winkler RL. Simple robust averages of forecasts: Some empirical results. *International Journal of Forecasting* 2008;24:163-9.
48. Hay SI, Rogers DJ, Shanks GD, *et al*. Malaria early warning in Kenya. *Trends Parasitol* 2001;17:95-9.
49. Shmueli G. To Explain or to predict? *Statistical Science* 2010;25:289-310.

1  
2  
3 50. Hyndman RJ, Athanasopoulos G. *Forecasting: principles and practice*. 2012.  
4  
5  
6 <http://otexts.com/fpp/> (accessed 3 May 2012).

7  
8 51. Hyndman RJ, Koehler AB. Another look at measures of forecast accuracy.  
9  
10 *International Journal of Forecasting* 2006;22:679-88.

11  
12 52. Armstrong JS, Collopy F. Error measures for generalizing about forecasting methods  
13  
14 - empirical comparisons. *International Journal of Forecasting* 1992;8:69-80.  
15  
16  
17  
18  
19  
20  
21  
22  
23  
24  
25  
26  
27  
28  
29  
30  
31  
32  
33  
34  
35  
36  
37  
38  
39  
40  
41  
42  
43  
44  
45  
46  
47  
48  
49  
50  
51  
52  
53  
54  
55  
56  
57  
58  
59  
60
